25 **ABSTRACT**

26 CCDC28B (coiled-coil domain-containing protein 28B) was identified as a modifier in  
27 the ciliopathy Bardet-Biedl syndrome (BBS). Our previous work in cells and zebrafish  
28 showed that CCDC28B plays a role regulating cilia length in a mechanism that is not  
29 completely understood. Here we report the generation of a *Ccdc28b* mutant mouse  
30 using CRISPR/Cas9 (*Ccdc28b mut*). After confirming the depletion of *Ccdc28b* we  
31 performed a phenotypic characterization showing that *Ccdc28b mut* animals present a  
32 mild phenotype: i) do not present clear structural cilia affectation, although we did  
33 observe mild defects in cilia density and cilia length in some tissues, ii) reproduce  
34 normally, and iii) do not develop retinal degeneration or obesity, two hallmark features  
35 of reported BBS murine models. In contrast, *Ccdc28b mut* mice did show clear social  
36 interaction defects as well as stereotypical behaviors suggestive of autism spectrum  
37 disorder (ASD). This finding is indeed relevant regarding CCDC28B as a modifier of  
38 BBS since behavioral phenotypes have been documented in BBS. Importantly however,  
39 our data suggests a possible causal link between CCDC28B and ASD-like phenotypes  
40 that exceeds the context of BBS: filtering for rare deleterious variants, we found  
41 *CCDC28B* mutations in eight probands from the Simmons Simplex Collection cohort.  
42 Furthermore, a phenotypic analysis showed that *CCDC28B* mutation carriers present  
43 lower BMI and mild communication defects compared to a randomly selected sample of  
44 SSC probands. Thus, our results suggest that mutations in *CCDC28B* lead to mild  
45 autism-like features in mice and humans. Overall, this work reports a novel mouse  
46 model that will be key to continue evaluating genetic interactions in BBS, deciphering  
47 the contribution of CCDC28B to modulate the presentation of BBS phenotypes. In  
48 addition, our data underscores a novel link between *CCDC28B* and ASD-like

49 phenotypes, providing a novel opportunity to further our understanding of the genetic,  
50 cellular, and molecular basis of ASD.

51

## 52 **AUTHOR SUMMARY**

53 Bardet-Biedl syndrome (BBS) is caused by mutations in any of 21 genes known to date.

54 In some families, BBS can be inherited as an oligogenic trait whereby mutations in

55 more than one BBS gene collaborate in the presentation of the syndrome. In addition,

56 *CCDC28B* was identified as a modifier of BBS, associated with a more severe

57 presentation of the syndrome. Different mechanisms, all relying on functional

58 redundancy, have been proposed to explain this genetic interaction and the

59 characterization of different BBS proteins supported this possibility as they were shown

60 to play roles in the same cellular organelle, the primary cilium.

61 Similarly, *CCDC28B* also participates in cilia biology regulating the length of

62 the organelle: knockdown of *CCDC28B* in cells results in cilia shortening and depletion

63 in zebrafish also results in early embryonic phenotypes characteristic of other cilia

64 mutants. Here, we sought to generate a mouse *Ccdc28b* mutant to determine whether it

65 would be sufficient to cause a ciliopathy phenotype, and to generate a reagent critical to

66 further dissect its modifying role in the context of BBS. Overall, *Ccdc28b* mutant mice

67 presented a mild phenotype, a finding fully compatible with a modifier rather than a

68 causal BBS gene. In addition, we found that *Ccdc28b* mutants showed a clear autism-

69 like behavior, and autism is indeed a feature of several BBS patients. Importantly, we

70 identified multiple individuals with autism from the Simmos Simplex Collection to

71 carry disruptive mutations in *CCDC28B* suggesting that this gene is causally associated

72 with autism independently of BBS.

## 73 INTRODUCTION

74 BBS is a rare disorder characterized by retinal degeneration, polydactyly, mental  
75 retardation, gonadal/renal malformations and obesity among other features [1]. BBS is a  
76 genetically heterogeneous condition with 21 genes known to cause the disease to date  
77 (*BBS1-BBS21*; [2] and references within). All the BBS proteins that have been  
78 characterized participate in the formation/maintenance of primary cilia [3-13].  
79 Therefore, BBS is a ciliopathy, a term used to group several human conditions that  
80 are caused by ciliary dysfunction and share, to different degrees, a set of characteristic  
81 phenotypes [14, 15]. While in most families BBS is inherited as an autosomal recessive  
82 trait, it has been shown that genetic interactions between BBS genes can modulate both  
83 the penetrance and expressivity of the syndrome, thus dubbing BBS as an oligogenic  
84 condition [16-25].

85 The functional characterization of BBS proteins has provided a  
86 cellular/molecular explanation to the oligogenicity observed in BBS, a phenomenon that  
87 typically relies on the presence of complementary pathways, complexes and/or some  
88 degree of functional redundancy [26]. In this context, BBS proteins present a significant  
89 functional overlap and can even interact directly forming multiprotein complexes. Eight  
90 BBS proteins form the BBSome, a complex that mediates traffic of ciliary components  
91 [5, 9, 12, 27-30]. Another group of BBS proteins (*BBS6*, *BBS10* and *BBS12*) have a  
92 chaperone activity critical for BBSome assembly [31], while others are important for  
93 BBSome recruitment to membranes [5] or to regulate the movement of the complex in  
94 and out of cilia [32]. Moreover, cilia are complex organelles composed of more than  
95 1000 proteins and with at least four main functional complexes including the BBSome,  
96 the transition zone, and two intraflagellar complexes for anterograde and retrograde  
97 transport respectively. Thus, mutations in different genes and ciliary modules can

98 contribute to cilia dysfunction and therefore to the pathogenesis of different ciliopathies  
99 (reviewed in for example [33, 34]).

100 *CCDC28B* (coiled-coil domain-containing protein 28B) was originally identified  
101 as a gene associated with Bardet-Biedl syndrome (BBS; OMIM 209900) by virtue of its  
102 physical interaction with different BBS proteins [35]. Moreover, it was shown to play a  
103 modifier role in BBS, at least in some patient cohorts [18, 35-37], whereby a reduction  
104 in *CCDC28B* levels, in a genetic background with mutations in *bona fide* BBS genes,  
105 was shown to correlate with a more severe presentation of the syndrome [35]. We have  
106 shown that *CCDC28B* also plays a role in cilia, thus providing insight on the cellular  
107 basis of its genetic modifier effect. Knockdown of *CCDC28B* in hTERT-RPE cells  
108 results in shortened cilia and a reduction in the percentage of ciliated cells. Targeting  
109 *ccdc28b* in zebrafish results in a distinct external phenotype characterized by a  
110 shortened body axis, increased body curvature, craniofacial and pigmentation defects  
111 and smaller eyes, phenotypes that have been described in other cilia mutants in the fish  
112 ([38, 39] and references within). Furthermore, the analysis of different ciliated tissues in  
113 zebrafish morphant embryos showed a clear reduction in both the number and length of  
114 cilia [38-40]. While the mechanism by which *CCDC28B* modulates cilia is still not  
115 completely understood, we have uncovered relevant protein-protein interactions. We  
116 were able to show that *CCDC28B* modulates cilia length, at least in part, through an  
117 interaction with SIN1, a member of mTORC2, but independently of the mTOR complex  
118 [40]. More recently, we showed that the molecular motor kinesin 1 is also involved in  
119 cilia length regulation by controlling *CCDC28B* sub-cellular localization [39].

120 In this work we aimed to generate a *Ccdc28b* knockout mouse that would i)  
121 allow us to determine whether loss of function of this gene is sufficient to cause cilia  
122 dysfunction and associated phenotypes in mammals, and ii) serve as a tool to study its

123 modifier effect in the context of BBS. We therefore targeted *Ccdc28b* in mice using  
124 CRISPR/Cas9 and performed an in-depth phenotypic characterization of mutant animals  
125 (*Ccdc28b mut*). We focused on phenotypes that have been described for BBS mouse  
126 mutant lines, which include the development of obesity driven by hyperphagia, and  
127 retinal degeneration. We show that depletion of *Ccdc28b* is not sufficient to cause overt  
128 ciliary defects in neither cells nor tissues, although a trend towards presenting a  
129 reduction in the percentage of cilia and mild cilia length defects were seen in a subset of  
130 the analyzed tissues. In agreement with this observation, *Ccdc28b mut* are viable,  
131 reproduce at mendelian rates and do not develop obesity or show signs of photoreceptor  
132 loss. *Ccdc28b mut* mice show however, autistic-like behaviors, phenotypes that are  
133 being documented in both BBS patients and animal models (see for example [41-47]).  
134 Finally, by analyzing the presence of *CCDC28B* mutations, as well as the phenotypic  
135 presentation of carrier probands, in the Simons Simplex Collection cohort we  
136 underscore a likely causal link between *CCDC28B* and mild features of autism. Our  
137 work generates a novel genetic model that recapitulates certain phenotypes observed in  
138 BBS patients, and allows for further dissection of genetic, cellular, and molecular basis  
139 of complex phenotypes relevant to both BBS and autism.

140

## 141 **RESULTS**

### 142 ***Generation of a *Ccdc28b* mouse model***

143 The mouse *Ccdc28b* gene (Gene ID 66264) is located on chromosome 4 and is  
144 composed of six exons with an open reading frame spanning from exon 2 to exon 6.  
145 Although several splicing isoforms have been reported (*Ensembl*  
146 ENSMUSG00000028795), as in humans, only two transcripts are predicted to encode  
147 full length proteins in mice. These are proteins of 200 and 204 amino acids respectively,

148 differing in their C-terminal regions (Fig 1A). To generate a knockout *Ccdc28b* murine  
149 line we choose to target exon 3, which is shared by all reported transcripts and coding  
150 isoforms, and is the exon affected by the mutation described in humans [35]. We  
151 designed two gRNAs to target the 5' end of exon 3 (Fig 1B) and verified their  
152 efficiency in targeting *Ccdc28b* by transiently transfecting a murine NIH3T3 cell line  
153 stably expressing CAS9 and performing an heteroduplex analysis. We then injected 294  
154 zygotes with *Cas9* mRNA and our two gRNAs. Upon analysis of 12 animals by PCR  
155 amplification of exon 3 from genomic DNA and sequencing, we were able to identify  
156 several mutations in six mice (50% mutation rate). We crossed two of those founder  
157 mice with C57BL/6J females (Jackson Lab stock # 000664) to segregate the mutations,  
158 and finally, we chose to continue our work with a mutation consisting of two one base  
159 pair deletions at the 5' end of exon 3, thus predicted to result in a frameshift and a PTC  
160 (Fig 1B). This mutant could potentially encode an 88 amino acid protein composed of  
161 the first 56 amino acids of *Ccdc28b* followed by 32 novel residues, although it is  
162 expected to be degraded by nonsense-mediated decay (NMD) (Fig 1B). We crossed a  
163 male mouse carrying the selected mutation with C57BL/6J females to start the colony  
164 and performed two rounds of crossing before starting the characterization of the line.

165         As a first step we aimed to confirm that the expression of *Ccdc28b* was  
166 abrogated. As mentioned, the mutation introduces a PTC likely targeting the mRNA for  
167 NMD. We analyzed *Ccdc28b* levels by qRT-PCR using specific primers and cDNA  
168 obtained from different tissues (*Ccdc28b* is widely expressed; [48]). As expected, we  
169 observed a significant reduction in *Ccdc28b* mRNA levels (Fig. 1C). We also PCR-  
170 amplified *Ccdc28b* from cDNA of E14 embryos (both *Ccdc28b mut* and C57BL/6J wt)  
171 with primers located at the far most 5' and 3' ends of the reported isoforms and  
172 sequenced the PCR products using Oxford Nanopore technology taking advantage of its

173 long-read sequencing. We detected the expected mutations and did not find any  
174 evidence of novel alternative transcripts in *Ccdc28b mut* samples (S1 Fig). Next, we  
175 evaluated *Ccdc28b* at the protein level by western blot: the expected ~22 KDa *Ccdc28b*  
176 band was absent in the *Ccdc28b mut* samples (Fig 1D; S2 Fig for full gels and muscle  
177 blot). Thus, our results indicate that we were able to generate a mutant *Ccdc28b* mouse  
178 line (*Ccdc28b mut*).

179

180 ***Depletion of Ccdc28b does not result in overt ciliary defects but may modulate cilia***  
181 ***length in a tissue dependent manner***

182 To begin the characterization of the mutant line we first focus on the known function of  
183 *Ccdc28b*. As previously mentioned, our work in hTERT-RPE cells and zebrafish  
184 uncovered a role for *Ccdc28b* in cilia whereby its depletion resulted in a reduction in  
185 ciliary length as well as a reduction in the percentage of ciliated cells [38-40]. We first  
186 focused on measuring cilia length and quantifying the proportion of cilia in mouse  
187 embryonic fibroblasts (MEFs) obtained from both *Ccdc28b mut* and C57BL/6J (wt)  
188 E14 embryos. We quantified the proportion of ciliated cells by counting nuclei and cilia  
189 per field, using anti  $\gamma$ -tubulin and anti-acetylated tubulin antibodies to visualize the  
190 basal body and ciliary axoneme respectively. We measured cilia length by analyzing at  
191 least eight randomly selected fields from each of *Ccdc28b mut* and wt MEFs. Our data  
192 showed that depletion of *Ccdc28b* did not result in shortened cilia nor affected ciliation  
193 in these cells: the median cilia length of wt MEFs was  $2.33 \pm 0.70 \mu\text{m}$  compared to  $2.31$   
194  $\pm 0.78 \mu\text{m}$  in *Ccdc28b mut* cells ( $P = 0.6522$ ; Fig. 2A-B).

195 *Ccdc28b mut* mice reproduce normally although when measuring weeks at first  
196 mating *Ccdc28b mut* females showed a delay (approximately 14 weeks) compared to  
197 C57BL/6J females (approximately 7 weeks). We then evaluated cilia in the kidney, a



198 tissue where cilia are readily observed. Kidneys from both control and *Ccdc28b mut*  
199 animals of 36 weeks of age were processed for immunofluorescence as described in the  
200 methods section. No major anatomical or histological differences were observed  
201 between *Ccdc28b mut* and wt animals and cilia were readily observed projecting into  
202 the lumen of tubules in both genotypes. Again, we quantified the number of cilia per  
203 field (assessing areas of comparable cell density) and cilia length. Although we could  
204 not find statistically significant differences neither in cilia number or length, we did  
205 observe a trend towards a reduction in cilia density in *Ccdc28b mut* preparations, both  
206 in the kidney cortex and medulla, compared to wt mice (Fig 2C-D). We also analyzed  
207 cilia in the brain. We evaluated amygdala, hippocampus CA1, dentate gyrus (S3 Fig)  
208 and performed an in-depth quantification of both cilia density and length in the striatum  
209 (Fig 3A-B). Cilia density was comparable between *Ccdc28b mut* and wt controls (Fig  
210 3B). Unexpectedly however, we observed a mild, albeit statistically significant,  
211 difference in cilia length whereby cilia in *Ccdc28b mut* animals were longer than  
212 controls:  $10.16 \pm 2.67 \mu\text{m}$  and  $9.38 \pm 2.40 \mu\text{m}$  respectively ( $P = 0.0022$ ; Fig. 3B). Thus,  
213 our results show that depletion of *Ccdc28b* does not result in a global cilia defect but  
214 can provoke cilia length changes at least in some tissues or cell types.

215

### 216 ***Ccdc28b mut* animals do not develop retinal degeneration or obesity**

217 To continue the characterization of *Ccdc28b mut* mice we focused on assessing two  
218 phenotypes that have been shown to be highly penetrant in both BBS patients [1] and  
219 different Bbs mouse models (for example see [44, 46, 49, 50]): retinal degeneration and  
220 obesity. In different Bbs mouse models (*Bbs2*, *Bbs4* and *Bbs12*) retinal degeneration has  
221 been shown to be progressive, first evident as a thinning of the outer nuclear layer  
222 (photoreceptors) by as early as 6 weeks of age and characterized by complete loss of the

223 outer segment in older animals (7 months old in *Bbs4*; [49]). In contrast, *Ccdc28b mut*  
224 retinas in both 12 weeks and 9 months old animals presented normal structure including  
225 the photoreceptor layer (Fig 3C; 9-month-old retinas are shown).

226 *Bbs2*, *Bbs4*, *Bbs6*, and *Bbs12* KOs, as well as a *Bbs1<sup>M390R/M390R</sup>* knock-in  
227 animals, develop obesity driven by hyperphagia [44-46, 49-51]. To assess whether our  
228 *Ccdc28b mut* animals present similar phenotypes we measured i) weight gain on normal  
229 diet, ii) weight gain on high fat diet (HFD), iii) food consumption and iv) systemic  
230 glucose handling (Fig 4). *Bbs* mutant animals have been reported to be runt at birth  
231 and then rapidly start gaining weight at an increased rate. *Ccdc28b mut* animals  
232 presented a normal appearance at birth and gained weight at comparable rates to control  
233 animals when fed *ad libitum* on a normal diet. Mice were followed up to 21 weeks of  
234 age (Fig 4A). Next, we generated two groups of animals (n= 7 per genotype) and fed  
235 them a HFD starting at 8 weeks of age. We did not observe significant weight  
236 differences between *Ccdc28b muts* and wt animals (Fig 4B-C). Accordingly, studying  
237 our mice in metabolic cages did not reveal any signs of increased food intake (Fig 4D-  
238 E). We also evaluated systemic glucose management by measuring glucose blood levels  
239 (basal glycemia) after 16 hours of starvation and performing glucose tolerance tests  
240 (GTT) before starting the HFD and at two time points during the treatment (7 and 11  
241 weeks in HFD respectively). *Ccdc28b mut* mice showed significantly elevated basal  
242 glucose levels after 7 weeks on HFD (Fig 4F). By 11 weeks of HFD the difference was  
243 lost but mainly due to an increase in the glucose basal levels in control animals (Fig 4F  
244 and S4 Fig). In the GTTs we did not observe statistically significant differences  
245 although *Ccdc28b mut* mice showed a trend towards an impaired GTT response,  
246 particularly after 11 weeks on HFD (Fig 4G-I). Overall, our results show that *Ccdc28b*

247 *mut* animals do not present hyperphagia or obesity but do show a mild phenotype  
248 related to systemic glucose management.

249

### 250 ***Ccdc28b KO animals present autism-like behavioral phenotypes***

251 Behavioral phenotypes have been reported in BBS patients [1, 52]. In agreement with  
252 this documented observations, social dominance defects and anxiety related responses  
253 have been well documented in different Bbs mouse models using standardized tests  
254 such as open field, light-dark box test and social dominance tube test [44-47]. In  
255 contrast, compulsive obsessive behavior and phenotypes related to autistic spectrum  
256 disorder have also been observed in BBS patients [1, 52] but have been less studied in  
257 mouse models. Importantly, Kerr and colleagues assessed the behavioral phenotypes in  
258 a cohort of twenty-four confirmed BBS patients demonstrating a high incidence of  
259 symptoms associated with autism [42]. In this context, we asked whether *Ccdc28b mut*  
260 mice displayed behaviors that could be relevant to BBS.

261 We started our analysis of *Ccdc28b mut* animals performing an open field test to  
262 assess exploratory activity and overall movement. We analyzed both female and male  
263 animals and did not find significant differences in total distance traveled between  
264 *Ccdc28b mut* and wt mice (Fig 5A). We also evaluated time freezing and time in the  
265 periphery versus center of the field where we did not find significant differences  
266 between genotypes on either females or males (Fig 5B-C). Next, we evaluated anxiety  
267 directly by performing the elevated plus maze test (EPM). *Ccdc28b mut* animals spent  
268 comparable amounts of time, and traveled comparable distances, in the open arms as  
269 control animals (Fig 5D). To directly test for alterations in hippocampal functions we  
270 performed a Novel Object Recognition (NOR) test. In this assay we evaluated memory  
271 by presenting individual animals with two objects for 10 min, and 24 hours later

272 exchanging one known object for a novel one: the number of interactions of each mouse  
273 with each object (known *vs* novel) was quantified as described in methods. Both  
274 *Ccdc28b mut* and wt controls showed a significantly higher number of interactions with  
275 the novel object (Fig 5E).

276         Next, to study the impact of *Ccdc28b* in Autism Spectrum Disorder (ASD)  
277 relevant behaviors, we performed a reciprocal social interaction test, a social dyadic test  
278 where the interrogated animal is presented with a previously unknown mouse to then  
279 quantify natural social behaviors. In this assay we evaluated anogenital, nose-nose and  
280 side sniffing, as well as grooming and rearing, measuring the number (frequency) of  
281 such behaviors in a period of 10 minutes. While *Ccdc28b mut* and wt did not differ in  
282 the frequency of anogenital sniffing or grooming, significant differences were readily  
283 observed for the other parameters: *Ccdc28b mut* animals presented a significant  
284 reduction in nose-nose and side sniffing and, in agreement with those results, also  
285 increased rearing (Fig 5F). Finally, we assessed stereotypical behaviors. Whereas  
286 *Ccdc28b mut* animals did not show differences in grooming when compared to controls  
287 (Fig 5G), *Ccdc28b mut* animals consistently buried more marbles than control animals  
288 in the marble burying test, a phenotype that was clearly observed both in males and  
289 females (Fig 5H). Altogether, our results show that while *Ccdc28b mut* mice neither  
290 present defects related to movement, grooming, nor signs of memory loss, they do show  
291 obsessive compulsive and ASD-related phenotypes.

292

### 293 ***CCDC28B mutations in individuals with autism***

294 We next examined the effect of deleterious mutations in *CCDC28B* among children  
295 with autism. We analyzed copy-number variation and single nucleotide variants (SNVs)  
296 involving *CCDC28B* among 2,532 individuals with autism and their families from the

297 Simons Simplex Collection (SSC). We identified seven probands with rare, deleterious  
298 SNVs in *CCDC28B* that were present at <0.001 frequency in the gnomAD control  
299 database, and one proband carried a duplication encompassing *CCDC28B* (Table 1). We  
300 also analyzed quantitative phenotypes of *CCDC28B* mutation carriers (Table 2) and  
301 compared them to a distribution of average scores derived from 1000 random sampling  
302 of equivalent numbers of probands from the cohort (see Methods). While quantitative  
303 measures of autism phenotypes such as intelligence quotient, child and adult behavioral  
304 measures, and repetitive behavior among these probands were not different from the  
305 rest of the affected individuals from the SSC cohort, *CCDC28B* mutation carriers  
306 showed a significantly reduced BMI (empirical  $P= 0.04$ ) than expected for the entire  
307 cohort and a milder social responsiveness raw score (empirical  $P= 0.04$ ) (S5 Fig). These  
308 results suggest that mutations in *CCDC28B* lead to milder autism features.  
309

310 **Table 1: *CCDC28B* mutations present in probands in the SSC.**

| <b>Sample</b>    | <b>Chr</b>  | <b>Position</b>           | <b>Ref</b> | <b>Alt</b> | <b>Mutation Type</b> | <b>CAD D</b> | <b>gnomAD Frequency</b> | <b>Inheritance</b> |
|------------------|-------------|---------------------------|------------|------------|----------------------|--------------|-------------------------|--------------------|
| <b>Proband 1</b> | <b>chr1</b> | <b>32201979</b>           | <b>C</b>   | <b>T</b>   | <b>missense</b>      | <b>22.9</b>  | <b>0.00002</b>          | <b>Father</b>      |
| <b>Proband 2</b> | <b>chr1</b> | <b>32201988</b>           | <b>C</b>   | <b>T</b>   | <b>missense</b>      | <b>22.9</b>  | <b>0.000056</b>         | <b>Mother</b>      |
| <b>Proband 3</b> | <b>chr1</b> | <b>32204030</b>           | <b>C</b>   | <b>T</b>   | <b>missense</b>      | <b>33</b>    | <b>0.000015</b>         | <b>Mother</b>      |
| <b>Proband 4</b> | <b>chr1</b> | <b>32204245</b>           | <b>C</b>   | <b>T</b>   | <b>missense</b>      | <b>33</b>    | <b>0.00002</b>          | <b>Father</b>      |
| <b>Proband 5</b> | <b>chr1</b> | <b>32204360</b>           | <b>T</b>   | <b>C</b>   | <b>missense</b>      | <b>26.9</b>  | <b>N/A</b>              | <b>De novo</b>     |
| <b>Proband 6</b> | <b>chr1</b> | <b>32204362</b>           | <b>G</b>   | <b>A</b>   | <b>missense</b>      | <b>28.3</b>  | <b>N/A</b>              | <b>De novo</b>     |
| <b>Proband 7</b> | <b>chr1</b> | <b>32204601</b>           | <b>G</b>   | <b>A</b>   | <b>missense</b>      | <b>24</b>    | <b>0.000005</b>         | <b>Mother</b>      |
| <b>Proband 8</b> | <b>chr1</b> | <b>31125281 - 3607897</b> | <b>-</b>   | <b>-</b>   | <b>duplication</b>   | <b>N/A</b>   | <b>N/A</b>              | <b>Mother</b>      |

311

312 **Table 2. Phenotypes in SSC probands carrying *CCDC28B* mutations.**

| <b>Sample</b>    | <b>ADI-R<br/>Diagnosis</b> | <b>Sex</b> | <b>FSIQ</b> | <b>CBCL<br/>External</b> | <b>CBCL<br/>Internal</b> | <b>SRS<br/>Raw<br/>Score</b> | <b>RBS<br/>R</b> | <b>DCD<br/>Q</b> | <b>BMI</b>   |
|------------------|----------------------------|------------|-------------|--------------------------|--------------------------|------------------------------|------------------|------------------|--------------|
| <b>Proband 1</b> | <b>Autism</b>              | <b>M</b>   | <b>107</b>  | <b>51</b>                | <b>70</b>                | <b>83</b>                    | <b>30</b>        | <b>51</b>        | <b>0.26</b>  |
| <b>Proband 2</b> | <b>Autism</b>              | <b>F</b>   | <b>83</b>   | <b>60</b>                | <b>51</b>                | <b>53</b>                    | <b>7</b>         | <b>34</b>        | <b>-0.71</b> |
| <b>Proband 3</b> | <b>Autism</b>              | <b>M</b>   | <b>72</b>   | <b>50</b>                | <b>56</b>                | <b>91</b>                    | <b>19</b>        | <b>58</b>        | <b>1.57</b>  |
| <b>Proband 4</b> | <b>Autism</b>              | <b>M</b>   | <b>108</b>  | <b>50</b>                | <b>66</b>                | <b>131</b>                   | <b>47</b>        | <b>54</b>        | <b>-0.86</b> |
| <b>Proband 5</b> | <b>Autism</b>              | <b>M</b>   | <b>89</b>   | <b>65</b>                | <b>72</b>                | <b>100</b>                   | <b>39</b>        | <b>46</b>        | <b>-0.72</b> |
| <b>Proband 6</b> | <b>Autism</b>              | <b>F</b>   | <b>100</b>  | <b>49</b>                | <b>46</b>                | <b>60</b>                    | <b>19</b>        | <b>54</b>        | <b>N/A</b>   |
| <b>Proband 7</b> | <b>Autism</b>              | <b>M</b>   | <b>127</b>  | <b>62</b>                | <b>75</b>                | <b>102</b>                   | <b>30</b>        | <b>28</b>        | <b>-1.61</b> |
| <b>Proband 8</b> | <b>ASD</b>                 | <b>F</b>   | <b>51</b>   | <b>57</b>                | <b>65</b>                | <b>N/A</b>                   | <b>17</b>        | <b>17</b>        | <b>0.73</b>  |

## 314 **DISCUSSION**

315 *CCDC28B* was first identified as a second site modifier of BBS whereby a reduction in  
316 its levels, in conjunction with mutations in *bona fide* BBS genes, was shown to result in  
317 a more severe presentation of the syndrome in some families [35]. Also, we have shown  
318 previously that *CCDC28B* participates in the regulation of cilia in both cells and *in vivo*  
319 in zebrafish: depletion of *ccdc28b* resulted in cilia shortening and defective ciliogenesis  
320 in different zebrafish tissues and organs [38-40]. Consequently, knockdown of *ccdc28b*  
321 in the fish using primarily a morpholino approach resulted in several phenotypes that  
322 are characteristic of Bbs and other ciliary mutants, such as a curved body axis,  
323 pigmentation defects, craniofacial malformations, and hydrocephaly ([38, 39] and  
324 references within). Therefore, while our previous results provided important functional  
325 information to understand *CCDC28B* biological role, they also led us to hypothesize  
326 that null mutations in *CCDC28B* could be sufficient to cause a ciliopathy such as BBS,  
327 or even the more severe Meckel-Gruber syndrome (MKS), two conditions with a high  
328 degree of genetic overlap [22, 38]. Importantly, the mutation described in patients, and  
329 shown to modify the presentation of the syndrome, is likely a hypomorphic mutation  
330 caused by a synonymous change affecting *CCDC28B* mRNA splicing thus resulting in  
331 reduced, but not abolished, *CCDC28B* levels [35].

332 We therefore decided to target *Ccdc28b* in the mouse and performed a  
333 characterization directing our attention to different phenotypes that have been reported  
334 previously for this gene (effect on cilia) and for BBS models. Overall, our data indicate  
335 that targeting *Ccdc28b* in the mouse is not sufficient to cause a strong ciliary defect and  
336 accordingly, does not cause phenotypes that are highly penetrant in different mouse Bbs  
337 models, such as retinal degeneration or the development of obesity. We cannot rule out  
338 at this point the possibility of *Ccdc28b mut* animals presenting a predisposition to



339 develop BBS like phenotypes. Older animals (we assessed mice up to 9 month of age)  
340 will have to be evaluated to test this possibility.

341 Our results are fully compatible with a second site modifier role for *CCDC28B*.  
342 *Ccdc28b mut* mice did not show signs of retinopathy and did not develop obesity at  
343 least up to nine months of age. Moreover, using metabolic cages we were able to show  
344 that *Ccdc28b muts* are not hyperphagic. Interestingly however, *Ccdc28b mut* mice show  
345 both a trend towards presenting a worst performance than controls in the GTTs and  
346 presented significantly higher glucose basal levels after 7 weeks on HFD. Thus, our  
347 results suggest a mild phenotype related to glucose handling. Interestingly, the  
348 consequences of BBS gene mutations on systemic glucose management are still not  
349 entirely clear. For example, while *Bbs4* KO animals have been shown to present  
350 impaired glucose handling, mainly due to defective insulin secretion [59], *Bbs12* KO  
351 animals have been shown to present an improved glucose metabolism [50]. Likewise,  
352 reports are showing that some BBS patients could present a dissociation between  
353 obesity and the development of type II diabetes [50, 60]. Thus, it will be interesting to  
354 study whether variants in genes such as *CCDC28B* could contribute to modulating the  
355 presentation of obesity in BBS. Crossing this new *Ccdc28b mut* mouse line with  
356 available *Bbs* mutants will allow to start tackling this issue.

357 This work also underscores differences with our previous data working on cells  
358 and zebrafish. Besides differences in models (culture cells vs zebrafish vs mouse), one  
359 possibility is that our *Ccdc28b mut* animals are not complete functional knockouts. We  
360 believe this to be unlikely considering our qRT-PCR, sequencing, and western blot  
361 results. Also, the mutant *Ccdc28b* ARNm could encode an 88 amino acid polypeptide  
362 which would only include the first 56 amino acids of *Ccdc28b*. We favor a second  
363 scenario which relies on genetic compensation, a mechanism that has been shown to be

364 particularly important to understand differences between targeting genes at the mRNA  
365 level versus at the genomic level [53, 54]. This phenomenon has been well documented  
366 in zebrafish and other model organisms where the same gene has been targeted, for  
367 example, using morpholinos to block mRNA splicing/translation, and through genome  
368 editing, highlighting the complexity and plasticity of the genome. Oftentimes the  
369 phenotype of morphants is significantly more severe than that of genomic mutants and  
370 different mechanisms have been shown to explain these differences. For example,  
371 CRISPR-Cas9 mutant lines have been shown to present altered mRNA splicing thus  
372 bypassing the mutated residue/exon [55]. As mentioned, we could not find any evidence  
373 for alternative splicing in our mice. Importantly however, the compensation can also  
374 occur by rescuing the cellular function rather than a particular gene. For example, *egfl7*  
375 (endothelial extracellular matrix gene) genomic mutants, but not morphants, upregulate  
376 genes that are functionally related to *egfl7* [54]. Similarly, while targeting *CEP290*  
377 (*NPHP6*), a ciliopathy gene linked to BBS, in zebrafish at the mRNA level resulted in  
378 severe cilia-related phenotypes, only a mild defect restricted to photoreceptors was  
379 observed in genomic mutants. Interestingly, the authors found that the mild presentation  
380 of the later was associated with the upregulation of several genes associated to ciliary  
381 function [56]. Importantly, it has been shown that upregulation of compensatory genes  
382 is triggered by mutations that introduce a PTC in a mechanism that relies on NMD [57,  
383 58]. Therefore, rather than a weakness of the *Ccdc28b mut* mouse model, its mild  
384 phenotype could be seen as an opportunity to perform transcriptomic/proteomic studies  
385 attempting to dissect this compensation mechanism. Such data will likely shed  
386 important insight to understand the biological role of *CCDC28B* and the  
387 cellular/molecular pathways involved in cilia regulation.

388           Finally, we did observe a clear behavioral phenotype in our *Ccdc28b mut*  
389 animals. Phenotypes such as anxiety, social dominance and associative learning defects,  
390 have been reported in different BBS mouse models [44-47]. For example, it was shown  
391 that BBS mice present problems in context fear conditioning due to impaired  
392 neurogenesis [47]. Our *Ccdc28b mut* animals did not show differences with controls in  
393 the open field, the EPM, or the NOR tests, thus ruling out significant locomotor,  
394 anxiety, and memory dysfunctions. *Ccdc28b mut* animals however did show clear social  
395 interaction defects as well as stereotypical phenotypes suggestive of an ASD-like  
396 behavior. Interestingly, ASD-like behaviors have been described in BBS patients (see  
397 for example [41-43]). Moreover, although historically reported as a rare presentation, a  
398 comprehensive study of behavioral phenotypes in twenty-four BBS patients even  
399 determined that autism related symptoms were present in 77% of cases [42]. Thus, it is  
400 tempting to speculate that decreased *CCDC28B* function could contribute to modulate  
401 the penetrance, the expressivity, or both, of ASD-like phenotypes in BBS patients, a  
402 possibility that will require further studies.

403           Interestingly, our results also suggest that *CCDC28B* could contribute causal  
404 alleles in ASD patients in a BBS-independent context: filtering for rare, likely  
405 deleterious variants, we identified eight SSC probands carrying *CCDC28B* mutations.  
406 Furthermore, by analyzing the phenotype of these probands in comparison with a  
407 randomly sampled group of SSC probands, our results suggest that mutations in  
408 *CCDC28B* could lead to milder forms of autism. Thus, this *Ccdc28b mut* mouse model  
409 could provide an opportunity to study cellular/molecular aspects of ASD phenotypes. In  
410 our analysis of the brain striatum, we observed that cilia were longer than controls.  
411 While this elongation was subtle, the difference was statistically significant. Two points  
412 regarding this cilia phenotype. First, all our previous data have clearly shown that

413 *Ccdc28b* plays a pro-ciliogenic role, whereby its depletion results in shortened cilia.  
414 Thus, one possibility is that the observation of longer cilia in striatum could be  
415 underscoring differences between cell types. It is tempting to speculate however that  
416 this slightly elongated cilia could be a consequence of genetic compensation and the  
417 upregulation of pro-ciliogenic genes in the absence of *Ccdc28b*. Further studies will be  
418 required to test this intriguing possibility. The second point to discuss here relates to the  
419 potential physiological relevance of this finding. Wang and colleagues recently  
420 published a work using induced pluripotent stem cell-derived (iPSC) neurons obtained  
421 from both BBS patients and controls where they show that mutations in BBS genes  
422 affect neurite outgrowth and neuronal energy homeostasis. Interestingly, BBS mutant  
423 iPSC-derived neurons presented elongated cilia [61]. Observing elongated cilia in a  
424 region of the brain that has been linked to the development of ASD conditions, like the  
425 striatum [62, 63], suggests the possibility of cilia playing an active role in the  
426 development of these conditions. Further work will be needed to determine whether this  
427 is the case, and our *Ccdc28b mut* model will likely be an important reagent in this  
428 context. More broadly, the mouse line presented here, together with other already  
429 available models, will likely contribute to further our still incomplete understanding of  
430 cilia in neuronal homeostasis, brain development, the establishment of neuronal  
431 circuitry and its impact on behavior [64-66]. Further dissecting the biological role of  
432 CCDC28B will likely shed important insight to understand not only BBS but also ASD.  
433

## 434 **METHODS**

### 435 **Animals**

436 All animal procedures to generate the mutant line were performed at the SPF animal  
437 facility of the Laboratory Animal Biotechnology Unit of Institut Pasteur de Montevideo.  
438 Experimental protocols were opportunely approved by the Institutional Animal Ethics  
439 Committee (protocol number 007-18), in accordance with national law 18.611 and  
440 international animal care guidelines (Guide for the Care and Use of Laboratory Animal;  
441 [67]) regarding laboratory animal's protocols. Mice were housed on individually  
442 ventilated cages (Tecniplast, Milan, Italy) containing chip bedding (Toplit 6, SAFE,  
443 Augy, France), in a controlled environment at  $20 \pm 1^\circ\text{C}$  with a relative humidity of 40-  
444 60%, in a 14/10 h light-dark cycle. Autoclaved food (Labdiet 5K67, PMI Nutrition, IN,  
445 US) and autoclaved filtered water were administered *ad libitum*.

446       Cytoplasmic microinjection was performed in C57BL/6J zygotes using a mix of  
447 30 ng/ $\mu\text{l}$  Cas9 mRNA (Synthego, Menlo Park, CA, US), and 15 ng/ $\mu\text{l}$  of each sgRNA (2  
448 guides were used) (Synthego), diluted in standard microinjection buffer. Viable  
449 embryos were transferred into the oviduct of B6D2F1 0.5 days post coitum (dpc)  
450 pseudo-pregnant females (25 embryos/female in average), following surgical  
451 procedures established in our animal facility [68]. For surgery, recipient females were  
452 anesthetized with a mixture of ketamine (100 mg/kg, Pharmaservice, Ripoll Vet,  
453 Montevideo, Uruguay) and xylazine (10 mg/kg, Seton 2%; Calier, Montevideo,  
454 Uruguay). Tolfenamic acid was administered subcutaneously (1 mg/kg, Tolfedine,  
455 Vetoquinol, Madrid, Spain) to provide analgesia and anti-inflammatory effects [69].  
456 Pregnancy diagnosis was determined by visual inspection by an experienced animal  
457 caretaker two weeks after embryo transfer, and litter size was recorded on day 7 after

458 birth. Pups were tail-biopsied and genotyped 21 days after birth, and mutant animals  
459 were maintained as founders.

460

#### 461 **RNA Isolation and qRT-PCR**

462 Tissues were homogenized in TRIzol (Invitrogen) for RNA extraction according to the  
463 manufacturer's protocol. Reverse transcription was done using SuperScript II RT  
464 (Invitrogen) and qRT-PCR was performed using SYBR FAST Universal 2X qPCR  
465 Master Mix (Kapa) on a QuantStudio 3 RT-PCR System (Thermo Fisher Scientific). All  
466 samples were run in triplicate and the CT value was normalized to calculate relative  
467 expression of each gene. The fold expression was calculated using the  $\Delta\Delta C_t$  method  
468 with *Gapdh* as a reference gene.

469

#### 470 **Western Blotting**

471 Tissues were lysed using RIPA buffer (25mM Tris pH 8.0, 150mM NaCl, 1% NP-40,  
472 0.1% SDS, 1% sodium deoxycholate) supplemented with a protease inhibitor cocktail  
473 (Sigma). Protein concentrations were determined using the BCA Protein Assay Kit  
474 (Thermo Fisher Scientific) and 100 $\mu$ g of total protein were loaded into SDS-PAGE  
475 gels, transferred to PVDF membranes and probed with anti-CCDC28B (Invitrogen,  
476 1/1000) overnight at 4°C. HRP-conjugated secondary antibody was used.

477

#### 478 **Cell culture and immunofluorescence**

479 Mouse embryonic fibroblasts (MEFs) were obtained from E13.5-E14.5 following  
480 standard procedures and maintained sub-confluent in DMEM Glutamax with 10% FBS,  
481 HEPES 10mM, penicillin 10000 U/mL and streptomycin 10000  $\mu$ g/mL (Maintenance  
482 Medium, MM) under controlled conditions at 37° C with 5% CO<sub>2</sub>. For

483 immunofluorescence studies cells were cultured on glass coverslips and at 80%  
484 confluency, MM was replaced with medium containing 0.5% FBS for 24 hr to stimulate  
485 ciliation. Cells were fixed with 4% paraformaldehyde (PFA) in 0.1 M phosphate buffer  
486 saline (PBS), permeabilized with 0.1% Triton-X100, blocked with 5.5% FBS and  
487 stained with anti-gamma and anti-acetylated tubulin primary antibodies (Sigma)  
488 followed by the corresponding secondary antibodies conjugated to AF488 or TMRM  
489 (Invitrogen). Nuclei were stained with DAPI (Invitrogen). Images were taken in a Zeiss  
490 LSM 880 confocal microscopy. Eight randomly selected confocal fields from cultured  
491 MEFs from at least two *Ccdc28b mut* and two wt embryos were analyzed. Cilia length  
492 was measured using the freehand ROI selection tool of the FIJI image processing  
493 package [70]. The proportion of ciliated cells was calculated by counting the number of  
494 cells showing  $\gamma$ -tubulin and anti-acetylated tubulin staining over the total number of  
495 nuclei.

496

#### 497 **Brain, kidney and eye histological and immunofluorescence analysis**

498 The perfusion of the mice was performed during the light (resting) phase of the sleep-  
499 wake cycle (between 12:00 and 16:00 h, lights on at 7:00). The animals were  
500 anaesthetized with ketamine/xylazine (90 and 14 mg/kg, respectively) and perfused with  
501 PBS followed by 4% PFA. Brains, kidneys and eyes were immediately dissected out and  
502 fixed by immersion in 4% PFA overnight (ON). Thereafter, the brains were  
503 cryoprotected in 30% sucrose solution in 0.1 M PBS for 48 h and frozen. Coronal  
504 sections (30  $\mu$ m) were obtained by a cryostat (Leica CM 1900, Leica Microsystems,  
505 Nussloch, Germany). Sections containing, hippocampus, amygdala and striatum (based  
506 on The mouse brain atlas; Paxinos & Franklin 2000) were collected and stored in an  
507 anti-freeze solution at  $-20$  °C until immunostaining procedures were performed.

508 Kidneys and eyes were embedded in paraffin and cut into 6 micron slices. Eye sections  
509 were dewaxed, rehydrated and stained with Hematoxylin and Eosin following standard  
510 procedures.

511 Cilia were detected in brain and kidney sections by immunofluorescence. Renal  
512 cilia were stained as previously described [71], using boiling in 10 mM citrate buffer,  
513 pH6, for antigen retrieval and anti-acetylated tubulin (Sigma) 1/300 in PBS containing  
514 0.5% of normal goat serum and 0.05% Tween20, for cilia detection. Goat anti-mouse Ig  
515 coupled to AF488 (Thermo) 1/1000 was used as secondary antibody and DAPI  
516 (Thermo) 1/5000 for nuclear staining. Cilia staining in brain sections was performed by  
517 detecting Type III adenylyl cyclase (AC-III). Briefly, free-floating sections were  
518 incubated with rabbit anti-AC-III primary antibodies 1/500 (Santa Cruz  
519 Biotechnologies) in PBS plus 0.3% Triton (PBS-T) and normal donkey serum (NDS)  
520 1.5% for 48 h at 4 °C. Then, the sections were incubated with biotinylated donkey anti-  
521 rabbit (DAR) 1/600 (Jackson ImmunoResearch) in PBS-T and NDS 3% for 90 min.  
522 Afterward, they were incubated with streptavidin-Alexa fluor 555 conjugate 1/2000  
523 (Molecular Probes) in PBS for 2 h. Finally, the sections were mounted in Superfrost  
524 Plus slides with Vectashield (Vector Labs) and Hoechst was included to visualize  
525 nuclei. Negative controls consisted of omission of the primary antibodies. We obtained  
526 three 20x microphotographs of each region of interest. Images were obtained in a  
527 confocal microscopy Zeiss LSM 880 using a 63x oil objective.

528

### 529 ***In vivo* metabolic studies**

530 The animals used in this study were raised and maintained according to standard  
531 protocols that were approved by the ethical committee at the Institut Pasteur de  
532 Montevideo (protocol number 003-19). Mice were fed *ad libitum*, first with a normal



533 control diet (ND, Labdiet 5K67, PMI Nutrition, IN, US) and then with a high-fat diet  
534 (HFD, Test Diet 5TJN). Body weight was recorded weekly. For the weight gain control  
535 in ND a group of 4 wt (2 males and 2 females), and 7 *Ccdc28b mut* (4 males and 3  
536 females) mice were followed up from week 4 to week 21. For weight gain in HFD a  
537 group of 7 wt and 7 *Ccdc28b mut* (all male) were fed with ND until week 8, then  
538 changed to HFD until week 21 when all mice were euthanized. For glucose tolerance  
539 testing, mice were starved for 16 h before receiving a single intraperitoneal glucose  
540 injection (1,5 g/kg). Glycemia was measured from tail vein blood using a hand-held  
541 glucometer (Accu-Chek, Roche). For food intake measurements, mice were transferred  
542 to metabolic cages, and after 24 h of adaptation, food was weighed every 24 h for three  
543 consecutive days.

544

#### 545 **Behavioral Analyses**

546 Behavioral assays were conducted in a total of 32 mice, all between 11 and 13 weeks  
547 old, divided as follows: 8 wt males, 8 *Ccdc28b mut* males, 8 wt females and 8 *Ccdc28b*  
548 *mut* females. Cohort 1 consisted of all 16 males and 3 females of each group, while  
549 cohort 2 consisted of 5 females of each group. All assays were recorded using Any-  
550 maze software, except the marble maze test, and for all assays where automatization  
551 was not possible, videos were scored by investigators blinded to genotype.

552

#### 553 **Open Field**

554 Locomotor activity was assayed in an open field opaque white plexiglass chamber (39  
555 x60x50 cm), where animals were left for 6 min sessions to explore freely and afterwards  
556 were returned to their home cages. Any-maze software was used to measure total  
557 distance, time freezing and time in central area.

558

### 559 **Marble Maze**

560 Marble maze test can be used to assess repetitive, compulsive-like behaviors [72].

561 Briefly, each individual mouse was placed in an arena (15x27x20 cm) for 30min, with a  
562 5cm layer of clean bedding, where 12 opaque glass marbles were distributed evenly. To  
563 be scored as buried, marbles had to be at least 50% covered by bedding.

564

### 565 **Grooming**

566 Grooming can be used as a repetitive behavior assay [73]. Cages were left without  
567 bedding to eliminate digging, which can be a competing behavior [74]. Mice were  
568 placed individually in standard mouse cages (15x27x13 cm). Sessions lasted 20 min,  
569 with the first 10 min being unscored as a habituation period. During the second 10 min  
570 of the session, cumulative time spent grooming was scored manually by an investigator  
571 uninformed of genotype.

572

### 573 **Reciprocal Interaction**

574 The reciprocal interaction test was used to assess social behaviors and interactions  
575 towards an age- and sex matched partner. To this end, mice were placed in standard  
576 mouse cages (15x27x13 cm), and interactions were recorded for 10 min, which is the  
577 period during which most social interactions happen [74]. The test was recorded using  
578 any-maze software and scored manually. Parameters of social behaviors measured were  
579 anogenital sniffing, nose-nose sniffing, side sniffing, self-grooming, and rearing [75,  
580 76].

581

### 582 **Elevated Plus Maze**

583 The Elevated Plus-Maze test is used as a model of anxiety [77, 78]. The apparatus  
584 consists of four arms (29x7), two of them with walls 16cm high (closed arms), and the  
585 other two have no walls, the open arms, the center that connects them is 8x8cm. This  
586 maze was placed 50cm from the floor, and mice were placed in the middle, facing an  
587 open arm and left to explore freely for 5 min. Time and distance spent in open arms was  
588 scored using Any-maze software.

589

### 590 **Novel object recognition**

591 This test is constructed to assess the mouse's ability to recognize a novel object in the  
592 environment, and is divided in three phases: habituation, familiarization, and test phase  
593 [79]. Briefly, on the first day, for the habituation period, animals were placed in an  
594 empty arena (25x25x35 cm) and left to explore for 5 min before returning to their home  
595 cages. 24 h later, the familiarization phase was performed, in which two identical  
596 objects were placed in the arena, and each mouse was allowed to explore for 10 min.  
597 Finally, on the third day, the test phase consisted of the mouse in the same arena for 10  
598 min, where one of the objects was switched for a novel object, previously unseen to the  
599 animal. During the last two phases, objects were placed in opposite and symmetrical  
600 corners of the arena [79, 80]. Behavior was scored for the first 2 min of the test phase,  
601 or until the mouse had interacted with both objects a total of 20 times.

602

### 603 **Analysis of the Simons Simplex Collection cohort**

604 We assessed for copy-number variants identified from microarrays and single  
605 nucleotide variants (SNV), including missense, loss of function, and splice-site  
606 mutations affecting *CCDC28B* from whole genome sequencing of 2,532 individuals  
607 from the Simons Simplex Collection (SSC) cohort. We filtered SNV calls to only

608 include variants predicted to be deleterious (with a CADD score >20). We analyzed  
609 seven different available quantitative phenotypes, including FSIQ, CBCL External,  
610 CBCL Internal, SRS raw score, RBS-R, DCDQ, and BMI z-scores. To test whether the  
611 average score observed in the probands with *CCDC28B* mutations was different than  
612 expected, we generated 1000 random samples of probands from the SSC that were of  
613 the same sample size as the number of probands *CCDC28B* mutations (7 or 8 depending  
614 on the phenotype) and calculated the average phenotype score for each of these 1000  
615 simulated samples. We then compared the average of the *CCDC28B* probands with the  
616 generated distribution and calculated (a) the number of standard deviations away from  
617 the sampled population mean (z scores), and (b) the proportion of samples with a  
618 phenotype score at least as extreme as the one observed in the *CCDC28B* mutation  
619 probands (empirical p).

620

## 621 **Statistical Analyses**

622 All data were analyzed using GraphPad Prism 9. Unpaired t-test was used to compare  
623 the fold expression in the qRT-PCR analysis. For GTT analysis, the area under the  
624 curve was calculated in GraphPad Prism 9, and then compared between both groups  
625 using the unpaired t-test. Basal glucose between both groups at different times was  
626 compared with the 2-way ANOVA with multiple comparisons. The proportion of cilia  
627 positive cells was calculated by counting the number of cilia with clear acetylated-  
628 tubulin signal over the total number of nuclei and the comparison between the different  
629 samples was performed using a test of Hypothesis specific for comparison of two  
630 proportions (hypothesis test for proportions). For the analysis of cilia length, and  
631 number of cilia per field, we first tested the data sets for normal distribution, using the  
632 Shapiro-Wilk test. If normal distribution was proved, unpaired t-test was used for

633 comparison and if data did not have a normal distribution comparisons were performed  
634 using the Mann-Whitney test. In all behavioral analysis (OF, MM, GR, RI and NOR)  
635 we first tested the datasets for normal distribution, using the Shapiro-Wilk test and  
636 identified outliers. After normal distribution was probed and outliers excluded, unpaired  
637 t-test was used to compare the two groups. In all cases, differences were considered  
638 significant when  $P$  values were smaller than 0.05.

639

## 640 **ACKNOWLEDGMENTS**

641 We thank Gabriel Anesetti (Dpto. de Histología y Embriología, Facultad de Medicina,  
642 UdelaR) for help with the immunofluorescence of renal tissues, Lucilla Pizzo for her  
643 advice on the manuscript and Paola Lepanto for her help with image processing.

644

645 *Competing Interests:* None declared

646

## 647 **FUNDING**

648 This study was supported by: Programa para el Desarrollo de las Ciencias Básicas  
649 (PEDECIBA) and Sistema Nacional de Investigadores- Agenica Nacional de  
650 Investigación e Innovación (ANII) to MF, MC-R, MB, VP-E, MC, PL, NL, CE, FI and  
651 JLB; CSIC I+D 2016-557 (Universidad de la República, Uruguay) to FI and JLB;  
652 Comisión Académica de Posgrados (CAP-UdelaR) to MF; FOCEM – Fondo para la  
653 Convergencia Estructural del Mercosur (COF 03/11). Santhosh Girirajan is supported  
654 by NIH R01 GM121907 and Corrine Smolen is supported by NIH T32-GM102057.

## 655 REFERENCES

- 656 1. Forsythe E, Beales PL. Bardet-Biedl syndrome. *Eur J Hum Genet.* 2013;21(1):8-  
657 13. doi: 10.1038/ejhg.2012.115. PubMed PMID: 22713813; PubMed Central PMCID:  
658 PMC3522196.
- 659 2. Heon E, Kim G, Qin S, Garrison JE, Tavares E, Vincent A, et al. Mutations in  
660 C8ORF37 cause Bardet Biedl syndrome (BBS21). *Hum Mol Genet.* 2016;25(11):2283-  
661 94. doi: 10.1093/hmg/ddw096. PubMed PMID: 27008867; PubMed Central PMCID:  
662 PMCPMC5081059.
- 663 3. Ansley SJ, Badano JL, Blacque OE, Hill J, Hoskins BE, Leitch CC, et al. Basal  
664 body dysfunction is a likely cause of pleiotropic Bardet-Biedl syndrome. *Nature.*  
665 2003;425:628-33.
- 666 4. Fan Y, Esmail MA, Ansley SJ, Blacque OE, Boroevich K, Ross AJ, et al.  
667 Mutations in a member of the Ras superfamily of small GTP-binding proteins causes  
668 Bardet-Biedl syndrome. *Nat Genet.* 2004;36:989-93.
- 669 5. Jin H, White SR, Shida T, Schulz S, Aguiar M, Gygi SP, et al. The conserved  
670 Bardet-Biedl syndrome proteins assemble a coat that traffics membrane proteins to cilia.  
671 *Cell.* 2010;141:1208-19.
- 672 6. Kim JC, Badano JL, Sibold S, Esmail MA, Hill J, Hoskins BE, et al. The Bardet-  
673 Biedl protein BBS4 targets cargo to the pericentriolar region and is required for  
674 microtubule anchoring and cell cycle progression. *Nat Genet.* 2004;36:462-70.
- 675 7. Kim JC, Ou YY, Badano JL, Esmail MA, Leitch CC, Fiedrich E, et al.  
676 MKKS/BBS6, a divergent chaperonin-like protein linked to the obesity disorder Bardet-  
677 Biedl syndrome, is a novel centrosomal component required for cytokinesis. *J Cell Sci.*  
678 2005;118:1007-20.
- 679 8. Li JB, Gerdes JM, Haycraft CJ, Fan Y, Teslovich TM, May-Simera H, et al.  
680 Comparative genomics identifies a flagellar and basal body proteome that includes the  
681 BBS5 human disease gene. *Cell.* 2004;117(4):541-52. PubMed PMID: 15137946.
- 682 9. Loktev AV, Zhang Q, Beck JS, Searby CC, Scheetz TE, Bazan JF, et al. A  
683 BBSome subunit links ciliogenesis, microtubule stability, and acetylation. *Dev Cell.*  
684 2008;15:854-65.
- 685 10. Marion V, Stoetzel C, Schlicht D, Messaddeq N, Koch M, Flori E, et al.  
686 Transient ciliogenesis involving Bardet-Biedl syndrome proteins is a fundamental  
687 characteristic of adipogenic differentiation. *Proc Natl Acad Sci U S A.* 2009;10:1820-5.
- 688 11. May-Simera HL, Ross A, Rix S, Forge A, Beales PL, Jagger DJ. Patterns of  
689 expression of Bardet-Biedl syndrome proteins in the mammalian cochlea suggest  
690 noncentrosomal functions. *J Comp Neurol.* 2009;514:174-88.
- 691 12. Nachury MV, Loktev AV, Zhang Q, Westlake CJ, Peranen J, Merdes A, et al. A  
692 core complex of BBS proteins cooperates with the GTPase Rab8 to promote ciliary  
693 membrane biogenesis. *Cell.* 2007;129(6):1201-13. doi: 10.1016/j.cell.2007.03.053.  
694 PubMed PMID: 17574030.
- 695 13. Prieto-Echague V, Lodh S, Colman L, Bobba N, Santos L, Katsanis N, et al.  
696 BBS4 regulates the expression and secretion of FSTL1, a protein that participates in  
697 ciliogenesis and the differentiation of 3T3-L1. *Sci Rep.* 2017;7. doi: 10.1038/s41598-  
698 017-10330-0.
- 699 14. Badano JL, Mitsuma N, Beales PL, Katsanis N. The Ciliopathies: An Emerging  
700 Class of Human Genetic Disorders. *Annu Rev Genomics Hum Genet.* 2006;22:125-48.
- 701 15. Hildebrandt F, Benzing T, Katsanis N. Ciliopathies. *N Engl J Med.*  
702 2011;364(16):1533-43. doi: 10.1056/NEJMra1010172. PubMed PMID: 21506742;  
703 PubMed Central PMCID: PMC3640822.

- 704 16. Badano JL, Kim JC, Hoskins BE, Lewis RA, Ansley SJ, Cutler DJ, et al.  
705 Heterozygous mutations in *BBS1*, *BBS2* and *BBS6* have a potential epistatic effect on  
706 Bardet-Biedl patients with two mutations at a second BBS locus. *Hum Mol Genet.*  
707 2003;12:1651-9.
- 708 17. Beales PL, Badano JL, Ross AJ, Ansley SJ, Hoskins BE, Kirsten B, et al.  
709 Genetic interaction of BBS1 mutations with alleles at other BBS loci can result in non-  
710 Mendelian Bardet-Biedl syndrome. *Am J Hum Genet.* 2003;72:1187-99.
- 711 18. Bin J, Madhavan J, Ferrini W, Mok CA, Billingsley G, Heon E. BBS7 and  
712 TTC8 (BBS8) mutations play a minor role in the mutational load of Bardet-Biedl  
713 syndrome in a multiethnic population. *Hum Mutat.* 2009;30(7):E737-46. doi:  
714 10.1002/humu.21040. PubMed PMID: 19402160.
- 715 19. Katsanis N. The oligogenic properties of Bardet-Biedl syndrome. *Hum Mol*  
716 *Genet.* 2004;13(Review issue 1):R65-R71.
- 717 20. Katsanis N, Ansley SJ, Badano JL, Eichers ER, Lewis RA, Hoskins BE, et al.  
718 Triallelic inheritance in Bardet-Biedl syndrome, a mendelian recessive disorder.  
719 *Science.* 2001;293:2256-9.
- 720 21. Katsanis N, Eichers ER, Ansley SJ, Lewis RA, Kayserili H, Hoskins BE, et al.  
721 BBS4 is a minor contributor to Bardet-Biedl syndrome and may also participate in  
722 triallelic inheritance. *Am J Hum Genet.* 2002;71:22-9.
- 723 22. Leitch CC, Zaghoul NA, Davis EE, Stoetzel C, Diaz-Font A, Rix S, et al.  
724 Hypomorphic mutations in syndromic encephalocele genes are associated with Bardet-  
725 Biedl syndrome. *Nat Genet.* 2008;40:443-8.
- 726 23. Lindstrand A, Frangakis S, Carvalho CM, Richardson EB, McFadden KA,  
727 Willer JR, et al. Copy-Number Variation Contributes to the Mutational Load of Bardet-  
728 Biedl Syndrome. *Am J Hum Genet.* 2016;99(2):318-36. Epub 2016/08/04. doi:  
729 10.1016/j.ajhg.2015.04.023. PubMed PMID: 27486776; PubMed Central PMCID:  
730 PMC4974085.
- 731 24. Manara E, Paolacci S, D'Esposito F, Abeshi A, Ziccardi L, Falsini B, et al.  
732 Mutation profile of BBS genes in patients with Bardet-Biedl syndrome: an Italian study.  
733 *Ital J Pediatr.* 2019;45(1):72. Epub 2019/06/15. doi: 10.1186/s13052-019-0659-1.  
734 PubMed PMID: 31196119; PubMed Central PMCID: PMC6567512.
- 735 25. Stoetzel C, Laurier V, Davis EE, Muller J, Rix S, Badano JL, et al. BBS10  
736 encodes a vertebrate-specific chaperonin-like protein and is a major BBS locus. *Nat*  
737 *Genet.* 2006;38:521-4.
- 738 26. Badano JL, Katsanis N. Beyond Mendel: an evolving view of human genetic  
739 disease transmission. *Nat Rev Genet.* 2002;3:779-89.
- 740 27. Chou HT, Apelt L, Farrell DP, White SR, Woodsmith J, Svetlov V, et al. The  
741 Molecular Architecture of Native BBSome Obtained by an Integrated Structural  
742 Approach. *Structure.* 2019. Epub 2019/07/16. doi: 10.1016/j.str.2019.06.006. PubMed  
743 PMID: 31303482.
- 744 28. Liew GM, Ye F, Nager AR, Murphy JP, Lee JS, Aguiar M, et al. The  
745 intraflagellar transport protein IFT27 promotes BBSome exit from cilia through the  
746 GTPase ARL6/BBS3. *Dev Cell.* 2014;31(3):265-78. doi: 10.1016/j.devcel.2014.09.004.  
747 PubMed PMID: 25443296; PubMed Central PMCID: PMC4255629.
- 748 29. Liu P, Lehtreck KF. The Bardet-Biedl syndrome protein complex is an adapter  
749 expanding the cargo range of intraflagellar transport trains for ciliary export. *Proc Natl*  
750 *Acad Sci U S A.* 2018;115(5):E934-E43. Epub 2018/01/18. doi:  
751 10.1073/pnas.1713226115. PubMed PMID: 29339469; PubMed Central PMCID:  
752 PMC5798339.

- 753 30. Veleri S, Bishop K, Dalle Nogare DE, English MA, Foskett TJ, Chitnis A, et al.  
754 Knockdown of Bardet-Biedl syndrome gene BBS9/PTHB1 leads to cilia defects. *PLoS*  
755 *One*. 2012;7:e34389.
- 756 31. Seo S, Baye LM, Schulz NP, Beck JS, Zhang Q, Slusarski DC, et al. BBS6,  
757 BBS10, and BBS12 form a complex with CCT/TRiC family chaperonins and mediate  
758 BBSome assembly. *Proc Natl Acad Sci U S A*. 2010;107:1488-93.
- 759 32. Seo S, Zhang Q, Bugge K, Breslow DK, Searby CC, Nachury MV, et al. A  
760 novel protein LZTFL1 regulates ciliary trafficking of the BBSome and Smoothed.  
761 *PLoS genetics*. 2011;7(11):e1002358. doi: 10.1371/journal.pgen.1002358. PubMed  
762 PMID: 22072986; PubMed Central PMCID: PMC3207910.
- 763 33. Cardenas-Rodriguez M, Badano JL. Ciliary Biology: Understanding the Cellular  
764 and Genetic Basis of Human Ciliopathies. *Am J Med Genet Part C Semin Med Genet*.  
765 2009;151C:263-80.
- 766 34. Zaghoul NA, Katsanis N. Functional modules, mutational load and human  
767 genetic disease. *Trends Genet*. 2010;26(4):168-76. doi: 10.1016/j.tig.2010.01.006.  
768 PubMed PMID: 20226561; PubMed Central PMCID: PMC3740181.
- 769 35. Badano JL, Leitch CC, Ansley SJ, May-Simera H, Lawson S, Lewis RA, et al.  
770 Dissection of epistasis in oligogenic Bardet-Biedl syndrome. *Nature*. 2006;439:326-30.
- 771 36. Abu-Safieh L, Al-Anazi S, Al-Abdi L, Hashem M, Alkuraya H, Alamr M, et al.  
772 In search of triallelism in Bardet-Biedl syndrome. *Eur J Hum Genet*. 2012;20:420-7.
- 773 37. Redin C, Le Gras S, Mhamdi O, Geoffroy V, Stoetzel C, Vincent MC, et al.  
774 Targeted high-throughput sequencing for diagnosis of genetically heterogeneous  
775 diseases: efficient mutation detection in Bardet-Biedl and Alstrom syndromes. *J Med*  
776 *Genet*. 2012;49(8):502-12. doi: 10.1136/jmedgenet-2012-100875. PubMed PMID:  
777 22773737; PubMed Central PMCID: PMC3436454.
- 778 38. Cardenas-Rodriguez M, Osborn DP, Irigoien F, Grana M, Romero H, Beales PL,  
779 et al. Characterization of CCDC28B reveals its role in ciliogenesis and provides insight  
780 to understand its modifier effect on Bardet-Biedl syndrome. *Hum Genet*.  
781 2013;132(1):91-105. doi: 10.1007/s00439-012-1228-5. PubMed PMID: 23015189.
- 782 39. Novas R, Cardenas-Rodriguez M, Lepanto P, Fabregat M, Rodao M, Fariello  
783 MI, et al. Kinesin 1 regulates cilia length through an interaction with the Bardet-Biedl  
784 syndrome related protein CCDC28B. *Sci Rep*. 2018;8(1):3019. Epub 2018/02/16. doi:  
785 10.1038/s41598-018-21329-6. PubMed PMID: 29445114; PubMed Central PMCID:  
786 PMC345813027.
- 787 40. Cardenas-Rodriguez M, Irigoien F, Osborn DP, Gascue C, Katsanis N, Beales  
788 PL, et al. The Bardet-Biedl syndrome-related protein CCDC28B modulates mTORC2  
789 function and interacts with SIN1 to control cilia length independently of the mTOR  
790 complex. *Hum Mol Genet*. 2013;22(20):4031-42. doi: 10.1093/hmg/ddt253. PubMed  
791 PMID: 23727834; PubMed Central PMCID: PMC3781634.
- 792 41. Chatterjee SS, Guha P, Talukdar A, Dasgupta G. Autism: a rare presentation of  
793 Bardet-Biedl syndrome. *BMJ Case Rep*. 2014;2014. Epub 2014/06/06. doi:  
794 10.1136/bcr-2014-203882. PubMed PMID: 24899006; PubMed Central PMCID:  
795 PMC34054480.
- 796 42. Kerr EN, Bhan A, Heon E. Exploration of the cognitive, adaptive and behavioral  
797 functioning of patients affected with Bardet-Biedl syndrome. *Clin Genet*.  
798 2016;89(4):426-33. Epub 2015/05/20. doi: 10.1111/cge.12614. PubMed PMID:  
799 25988237.
- 800 43. Aleman TS, O'Neil EC, O'Connor K, Jiang YY, Aleman IA, Bennett J, et al.  
801 Bardet-Biedl syndrome-7 (BBS7) shows treatment potential and a cone-rod dystrophy  
802 phenotype that recapitulates the non-human primate model. *Ophthalmic Genet*.



- 803 2021;42(3):252-65. Epub 2021/03/18. doi: 10.1080/13816810.2021.1888132. PubMed  
804 PMID: 33729075.
- 805 44. Eichers ER, Abd-El-Barr MM, Paylor R, Lewis RA, Bi W, Lin X, et al.  
806 Phenotypic characterization of Bbs4 null mice reveals age-dependent penetrance and  
807 variable expressivity. *Hum Genet.* 2006;120(2):211-26. doi: 10.1007/s00439-006-0197-  
808 y. PubMed PMID: 16794820.
- 809 45. Fath MA, Mullins RF, Searby C, Nishimura DY, Wei J, Rahmouni K, et al.  
810 Mkks-null mice have a phenotype resembling Bardet-Biedl syndrome. *Hum Mol Genet.*  
811 2005;14:1109-18.
- 812 46. Nishimura DY, Fath M, Mullins RF, Searby C, Andrews M, Davis R, et al.  
813 Bbs2-null mice have neurosensory deficits, a defect in social dominance, and  
814 retinopathy associated with mislocalization of rhodopsin. *Proc Natl Acad Sci U S A.*  
815 2004;101:16588-93.
- 816 47. Pak TK, Carter CS, Zhang Q, Huang SC, Searby C, Hsu Y, et al. A mouse  
817 model of Bardet-Biedl Syndrome has impaired fear memory, which is rescued by  
818 lithium treatment. *PLoS genetics.* 2021;17(4):e1009484. Epub 2021/04/23. doi:  
819 10.1371/journal.pgen.1009484. PubMed PMID: 33886537; PubMed Central PMCID:  
820 PMC8061871.
- 821 48. Yue F, Cheng Y, Breschi A, Vierstra J, Wu W, Ryba T, et al. A comparative  
822 encyclopedia of DNA elements in the mouse genome. *Nature.* 2014;515(7527):355-64.  
823 Epub 2014/11/21. doi: 10.1038/nature13992. PubMed PMID: 25409824; PubMed  
824 Central PMCID: PMC4266106.
- 825 49. Mykytyn K, Mullins RF, Andrews M, Chiang AP, Swiderski RE, Yang B, et al.  
826 Bardet-Biedl syndrome type 4 (BBS4)-null mice implicate Bbs4 in flagella formation  
827 but not global cilia assembly. *Proc Natl Acad Sci U S A.* 2004;101(23):8664-9. Epub  
828 2004/06/03. doi: 10.1073/pnas.0402354101. PubMed PMID: 15173597; PubMed  
829 Central PMCID: PMC423252.
- 830 50. Marion V, Mockel A, De Melo C, Obringer C, Clausmann A, Simon A, et al.  
831 BBS-induced ciliary defect enhances adipogenesis, causing paradoxical higher-insulin  
832 sensitivity, glucose usage, and decreased inflammatory response. *Cell metabolism.*  
833 2012;16(3):363-77. doi: 10.1016/j.cmet.2012.08.005. PubMed PMID: 22958920.
- 834 51. Davis RE, Swiderski RE, Rahmouni K, Nishimura DY, Mullins RF,  
835 Agassandian K, et al. A knockin mouse model of the Bardet-Biedl syndrome 1 M390R  
836 mutation has cilia defects, ventriculomegaly, retinopathy, and obesity. *Proc Natl Acad  
837 Sci U S A.* 2007;104(49):19422-7. doi: 10.1073/pnas.0708571104. PubMed PMID:  
838 18032602; PubMed Central PMCID: PMC2148305.
- 839 52. Beales PL, Elcioglu N, Woolf AS, Parker D, Flinter FA. New criteria for  
840 improved diagnosis of Bardet-Biedl syndrome: results of a population survey. *J Med  
841 Genet.* 1999;36:437-46.
- 842 53. El-Brolosy MA, Stainier DYR. Genetic compensation: A phenomenon in search  
843 of mechanisms. *PLoS genetics.* 2017;13(7):e1006780. Epub 2017/07/14. doi:  
844 10.1371/journal.pgen.1006780. PubMed PMID: 28704371; PubMed Central PMCID:  
845 PMC5509088.
- 846 54. Rossi A, Kontarakis Z, Gerri C, Nolte H, Holper S, Kruger M, et al. Genetic  
847 compensation induced by deleterious mutations but not gene knockdowns. *Nature.*  
848 2015;524(7564):230-3. Epub 2015/07/15. doi: 10.1038/nature14580. PubMed PMID:  
849 26168398.
- 850 55. Anderson JL, Mulligan TS, Shen MC, Wang H, Scahill CM, Tan FJ, et al.  
851 mRNA processing in mutant zebrafish lines generated by chemical and CRISPR-  
852 mediated mutagenesis produces unexpected transcripts that escape nonsense-mediated

- 853 decay. *PLoS genetics*. 2017;13(11):e1007105. Epub 2017/11/22. doi:  
854 10.1371/journal.pgen.1007105. PubMed PMID: 29161261; PubMed Central PMCID:  
855 PMC5716581.
- 856 56. Cardenas-Rodriguez M, Austin-Tse C, Bergboer JGM, Molinari E, Sugano Y,  
857 Bachmann-Gagescu R, et al. Genetic compensation for cilia defects in *cep290* mutants  
858 by upregulation of cilia-associated small GTPases. *J Cell Sci*. 2021;134(14). Epub  
859 2021/06/23. doi: 10.1242/jcs.258568. PubMed PMID: 34155518; PubMed Central  
860 PMCID: PMC8325957.
- 861 57. El-Brolosy MA, Kontarakis Z, Rossi A, Kuenne C, Gunther S, Fukuda N, et al.  
862 Genetic compensation triggered by mutant mRNA degradation. *Nature*.  
863 2019;568(7751):193-7. Epub 2019/04/05. doi: 10.1038/s41586-019-1064-z. PubMed  
864 PMID: 30944477; PubMed Central PMCID: PMC6707827.
- 865 58. Ma Z, Zhu P, Shi H, Guo L, Zhang Q, Chen Y, et al. PTC-bearing mRNA elicits  
866 a genetic compensation response via Upf3a and COMPASS components. *Nature*.  
867 2019;568(7751):259-63. Epub 2019/04/05. doi: 10.1038/s41586-019-1057-y. PubMed  
868 PMID: 30944473.
- 869 59. Gerdes JM, Christou-Savina S, Xiong Y, Moede T, Moruzzi N, Karlsson-Edlund  
870 P, et al. Ciliary dysfunction impairs beta-cell insulin secretion and promotes  
871 development of type 2 diabetes in rodents. *Nature communications*. 2014;5:5308. doi:  
872 10.1038/ncomms6308. PubMed PMID: 25374274.
- 873 60. Feuillan PP, Ng D, Han JC, Sapp JC, Wetsch K, Spaulding E, et al. Patients with  
874 Bardet-Biedl syndrome have hyperleptinemia suggestive of leptin resistance. *J Clin  
875 Endocrinol Metab*. 2011;96(3):E528-35. doi: 10.1210/jc.2010-2290. PubMed PMID:  
876 21209035; PubMed Central PMCID: PMC3047221.
- 877 61. Wang L, Liu Y, Stratigopoulos G, Panigrahi S, Sui L, Zhang Y, et al. Bardet-  
878 Biedl syndrome proteins regulate intracellular signaling and neuronal function in  
879 patient-specific iPSC-derived neurons. *The Journal of clinical investigation*.  
880 2021;131(8). Epub 2021/02/26. doi: 10.1172/JCI146287. PubMed PMID: 33630762;  
881 PubMed Central PMCID: PMC8262481.
- 882 62. Amaral DG, Schumann CM, Nordahl CW. Neuroanatomy of autism. *Trends  
883 Neurosci*. 2008;31(3):137-45. Epub 2008/02/09. doi: 10.1016/j.tins.2007.12.005.  
884 PubMed PMID: 18258309.
- 885 63. Rothwell PE, Fuccillo MV, Maxeiner S, Hayton SJ, Gokce O, Lim BK, et al.  
886 Autism-associated neuroligin-3 mutations commonly impair striatal circuits to boost  
887 repetitive behaviors. *Cell*. 2014;158(1):198-212. Epub 2014/07/06. doi:  
888 10.1016/j.cell.2014.04.045. PubMed PMID: 24995986; PubMed Central PMCID:  
889 PMC4120877.
- 890 64. Guo J, Otis JM, Higginbotham H, Monckton C, Cheng J, Asokan A, et al.  
891 Primary Cilia Signaling Shapes the Development of Interneuronal Connectivity. *Dev  
892 Cell*. 2017;42(3):286-300 e4. Epub 2017/08/09. doi: 10.1016/j.devcel.2017.07.010.  
893 PubMed PMID: 28787594; PubMed Central PMCID: PMC5571900.
- 894 65. Lepanto P, Badano JL, Zolessi FR. Neuron's little helper: The role of the  
895 primary cilium in neurogenesis. *Neurogenesis*. 2016;3(1):e1253363. doi:  
896 10.1080/23262133.2016.1253363.
- 897 66. Park SM, Jang HJ, Lee JH. Roles of Primary Cilia in the Developing Brain.  
898 *Front Cell Neurosci*. 2019;13:218. Epub 2019/05/30. doi: 10.3389/fncel.2019.00218.  
899 PubMed PMID: 31139054; PubMed Central PMCID: PMC6527876.
- 900 67. animals Cftuotgftcauol. Guide for the care and use of laboratory animals. 8th ed.  
901 ed: Washington (DC): National Academies Press; 2011.

- 902 68. Meikle MN, Schlapp G, Menchaca A, Crispo M. Minimum volume Spatula  
903 MVD vitrification method improves embryo survival compared to traditional slow  
904 freezing, both for in vivo and in vitro produced mice embryos. *Cryobiology*.  
905 2018;84:77-81. Epub 2018/07/25. doi: 10.1016/j.cryobiol.2018.07.005. PubMed PMID:  
906 30040919.
- 907 69. Schlapp G, Goyeneche L, Fernandez G, Menchaca A, Crispo M. Administration  
908 of the nonsteroidal anti-inflammatory drug tolfenamic acid at embryo transfer improves  
909 maintenance of pregnancy and embryo survival in recipient mice. *J Assist Reprod  
910 Genet*. 2015;32(2):271-5. Epub 2015/01/07. doi: 10.1007/s10815-014-0378-x. PubMed  
911 PMID: 25561155; PubMed Central PMCID: PMC4354194.
- 912 70. Schindelin J, Arganda-Carreras I, Frise E, Kaynig V, Longair M, Pietzsch T, et  
913 al. Fiji: an open-source platform for biological-image analysis. *Nat Methods*.  
914 2012;9(7):676-82. doi: 10.1038/nmeth.2019. PubMed PMID: 22743772; PubMed  
915 Central PMCID: PMC3855844.
- 916 71. Deane JA, Verghese E, Martelotto LG, Cain JE, Galtseva A, Rosenblum ND, et  
917 al. Visualizing renal primary cilia. *Nephrology (Carlton)*. 2013;18(3):161-8. Epub  
918 2012/12/18. doi: 10.1111/nep.12022. PubMed PMID: 23240784.
- 919 72. Angoa-Perez M, Kane MJ, Briggs DI, Francescutti DM, Kuhn DM. Marble  
920 burying and nestlet shredding as tests of repetitive, compulsive-like behaviors in mice. *J  
921 Vis Exp*. 2013;(82):50978. Epub 2014/01/17. doi: 10.3791/50978. PubMed PMID:  
922 24429507; PubMed Central PMCID: PMC4108161.
- 923 73. Arakawa H. Implication of the social function of excessive self-grooming  
924 behavior in BTBR T(+)/lpr3(tf)/J mice as an idiopathic model of autism. *Physiol Behav*.  
925 2021;237:113432. Epub 2021/04/27. doi: 10.1016/j.physbeh.2021.113432. PubMed  
926 PMID: 33901528.
- 927 74. Dhamne SC, Silverman JL, Super CE, Lammers SHT, Hameed MQ, Modi ME,  
928 et al. Replicable in vivo physiological and behavioral phenotypes of the Shank3B null  
929 mutant mouse model of autism. *Mol Autism*. 2017;8:26. Epub 2017/06/24. doi:  
930 10.1186/s13229-017-0142-z. PubMed PMID: 28638591; PubMed Central PMCID:  
931 PMC5472997.
- 932 75. Chang YC, Cole TB, Costa LG. Behavioral Phenotyping for Autism Spectrum  
933 Disorders in Mice. *Curr Protoc Toxicol*. 2017;72:11 22 1-11 22 1. Epub 2017/05/04.  
934 doi: 10.1002/cptx.19. PubMed PMID: 28463420; PubMed Central PMCID:  
935 PMC5494990.
- 936 76. Crawley JN. Mouse behavioral assays relevant to the symptoms of autism. *Brain  
937 Pathol*. 2007;17(4):448-59. Epub 2007/10/09. doi: 10.1111/j.1750-3639.2007.00096.x.  
938 PubMed PMID: 17919130.
- 939 77. Rodgers RJ, Dalvi A. Anxiety, defence and the elevated plus-maze. *Neurosci  
940 Biobehav Rev*. 1997;21(6):801-10. Epub 1998/01/07. doi: 10.1016/s0149-  
941 7634(96)00058-9. PubMed PMID: 9415905.
- 942 78. Walf AA, Frye CA. The use of the elevated plus maze as an assay of anxiety-  
943 related behavior in rodents. *Nat Protoc*. 2007;2(2):322-8. Epub 2007/04/05. doi:  
944 10.1038/nprot.2007.44. PubMed PMID: 17406592; PubMed Central PMCID:  
945 PMC3623971.
- 946 79. Antunes M, Biala G. The novel object recognition memory: neurobiology, test  
947 procedure, and its modifications. *Cogn Process*. 2012;13(2):93-110. Epub 2011/12/14.  
948 doi: 10.1007/s10339-011-0430-z. PubMed PMID: 22160349; PubMed Central PMCID:  
949 PMC3332351.

950 80. Lueptow LM. Novel Object Recognition Test for the Investigation of Learning  
951 and Memory in Mice. *J Vis Exp.* 2017;(126). Epub 2017/09/12. doi: 10.3791/55718.  
952 PubMed PMID: 28892027; PubMed Central PMCID: PMC5614391.

## 954 **Figure Legends**

955 **Figure 1: Targeting *Ccdc28b* in the mouse.** **A)** Schematic representation of murine  
956 *Ccdc28b* genomic structure, showing exon distribution and the two main reported  
957 protein coding ORFs that encode two isoforms differing in their C-terminal sequences.  
958 **B)** Graphic representation showing the two gRNAs used in this study targeting the 5'  
959 end of exon 3. The selected mutation comprises two single base deletions leading to a  
960 frameshift and the introduction of a PTC. **C)** Real-time quantitative PCR was used to  
961 show a significant reduction in *Ccdc28b* mRNA levels, likely due to NMD-mediated  
962 degradation of PTC containing mRNA. Expression of *Gapdh* was used for  
963 normalization. Results are shown as fold change compared to wt animals. \*\*=  $P < 0.01$   
964 and \*\*\*=  $P < 0.001$ . **D)** Western blot analysis showing that a band corresponding to the  
965 *Ccdc28b* expected molecular weight (aprox. 22 KDa) is depleted in tissues of *Ccdc28b*  
966 *mut* animals. Full gels are shown in S2 Fig.

967

968 **Figure 2: Characterization of cilia in *Ccdc28b* mut cells and tissue.** **A)** Confocal  
969 images of wt and *Ccdc28b* *mut* Mouse Embryonic Fibroblasts (MEFs). DAPI (blue),  
970 acetylated tubulin (green) and  $\gamma$ -tubulin (red) were used to visualize nuclei, ciliary  
971 axoneme and basal body, respectively. **B)** Cilia length was measured in more than 190  
972 cilia from wt and *Ccdc28b* *mut* MEFs. Data are presented as individual values plus  
973 mean  $\pm$  SD. **C)** Confocal images of wt and *Ccdc28b* *mut* kidneys. The upper panels  
974 correspond to kidney cortex, and the lower panels correspond to kidney medulla. DAPI  
975 (blue) and anti-acetylated tubulin (green) were used to visualize nuclei and cilia  
976 respectively. **D)** Quantification of number of cilia per field and cilia length. Data did not  
977 have normal distribution and are shown as individual values plus median with  
978 interquartile range. Despite no significant differences were found there is a trend

979 towards a reduction in cilia density in both regions in *Ccdc28b* mut kidneys. ns: not  
980 significant.

981

982 **Figure 3: Analysis of brain cilia and the retina in *Ccdc28b* mut animals. A)**

983 Confocal images showing cilia in the brain striatum. DAPI (magenta) and anti-Type III

984 adenylyl cyclase (ACIII, green) were used to visualize nuclei and ciliary axoneme

985 respectively. Bars in main pictures and insets correspond to 50 and 20 microns

986 respectively. **B)** Quantification of number of cilia per field (at least three pictures per

987 animal, and three animals per genotype) and cilia length (one picture per animal, three

988 animals per genotype) in striatum. Results are represented as individual values plus

989 median with interquartile range. \*\*=  $P < 0.005$ . **C)** Hematoxylin and eosin stained

990 retinal sections of wt and *Ccdc28b* mut mice. No structural differences were observed in

991 the photoreceptor layer. INL= inner nuclear layer; ONL= outer nuclear layer; OS=

992 Outer segment; RPE= retinal pigment epithelium; CH= choroid.

993

994 **Figure 4: Metabolic characterization of *Ccdc28b* mut mice. A)** Growth curve of

995 *Ccdc28b* mut and wt littermates during a ND *ad libitum*. **B)** Growth curve of *Ccdc28b*

996 mut and wt littermates during a HFD *ad libitum*. Animals at week -2 of diet were 6

997 weeks old. **C)** Weight gain curve of animals shown in B. Weight is normalized to the

998 value at week -2. **D)** Food intake measured in metabolic cages. **E)** Food intake showed

999 in D normalized to body weight. In all sections error bars correspond to mean and SD.

1000 **F)** Basal glycemia measured in the corresponding GTT tests (panels G-I) measured at 8,

1001 15 and 19 weeks of age. \*=  $P < 0.05$ . **G-I)** GTT results for *Ccdc28b* mut and wt

1002 controls at 8 weeks of age and normal diet (G), at 15 weeks of age with 7 weeks of HFD

1003 (H) and at 19 weeks of age after 11 weeks of HFD (I). Both glucose level curves and the

1004 quantification of the area under the curve are shown as mean  $\pm$  SD of the analyzed  
1005 animals.  
1006  
1007 **Figure 5: Evaluation of behavioral and social phenotypes in *Ccdc28b* mut mice.** An  
1008 open-field test was performed, and different parameters were scored: total distance  
1009 traveled (animals of both sexes are shown together with different colors) (**A**), time  
1010 freezing (**B**) and time in the periphery vs center of the field (**C**). No differences were  
1011 observed between wt and *Ccdc28b* mut mice. **D**) Results from elevated plus maze test  
1012 showed no signs of anxiety as wt and *Ccdc28b* mut mice spent comparable amounts of  
1013 time, and travelled comparable distances, in the open arms. **E**) The Novel Object  
1014 Recognition test showed that there is no alteration in memory in *Ccdc28b* mut mice, as  
1015 they presented an equally higher number of interactions with novel objects when  
1016 compared to wt mice. **F**) Reciprocal Social Interaction Test resulted in significant  
1017 differences in nose-nose, side sniffing, and rearing, consistent with an Autism Spectrum  
1018 Disorder (ASD) related phenotype, while no differences were found in anogenital  
1019 sniffing. **G**) No differences were observed in grooming time between *Ccdc28b* and wt  
1020 animals. **H**) Marble burying test showing that *Ccdc28b* mut buried more marbles than  
1021 wt animals, a behavior consistent with an obsessive-compulsive phenotype. In all  
1022 graphs where female and male mice are shown together, light blue indicates male and  
1023 light red shows females. Triangles were used to indicate the five females analyzed in the  
1024 second cohort (see Methods). All error bars correspond to mean and SEM. \*=  $P < 0.05$ ;  
1025 \*\*\*\*= $P < 0.0001$ .

1026 **Supplementary Figure Legends**

1027

1028 **Supplementary S1 Fig:** Nanopore sequence alignments to the genomic *Ccdc28b*

1029 region.

1030

1031 **Supplementary S2 Fig:** Full length western blot gels assessing the levels of *Ccdc28b*

1032 in brain and muscle.

1033

1034 **Supplementary S3 Fig:** Confocal images showing A) amygdala (bar= 50  $\mu$ m), B)

1035 hippocampal CA1 (bar= 50  $\mu$ m), C) dentate gyrus (bar= 50  $\mu$ m). DAPI (magenta) and

1036 anti-ACIII antibody (green) were used for nucleus and cilia visualization respectively.

1037

1038 **Supplementary S4 Fig:** Comparison of basal glycemia at three timepoints during the

1039 HFD experiment for each genotype (*Ccdc28b mut* and wt).

1040

1041 **Supplementary S5 Fig:** Comparison of average phenotypic scores of probands with

1042 *CCDC28B* mutations with a distribution of average scores of 7 or 8 probands drawn

1043 randomly 1000 times. Note that the phenotypic data were available for all eight or seven

1044 probands for the tested phenotypes.

1045

1046

1047



A

*Mus Musculus Ccdc28b* (Chr. 4)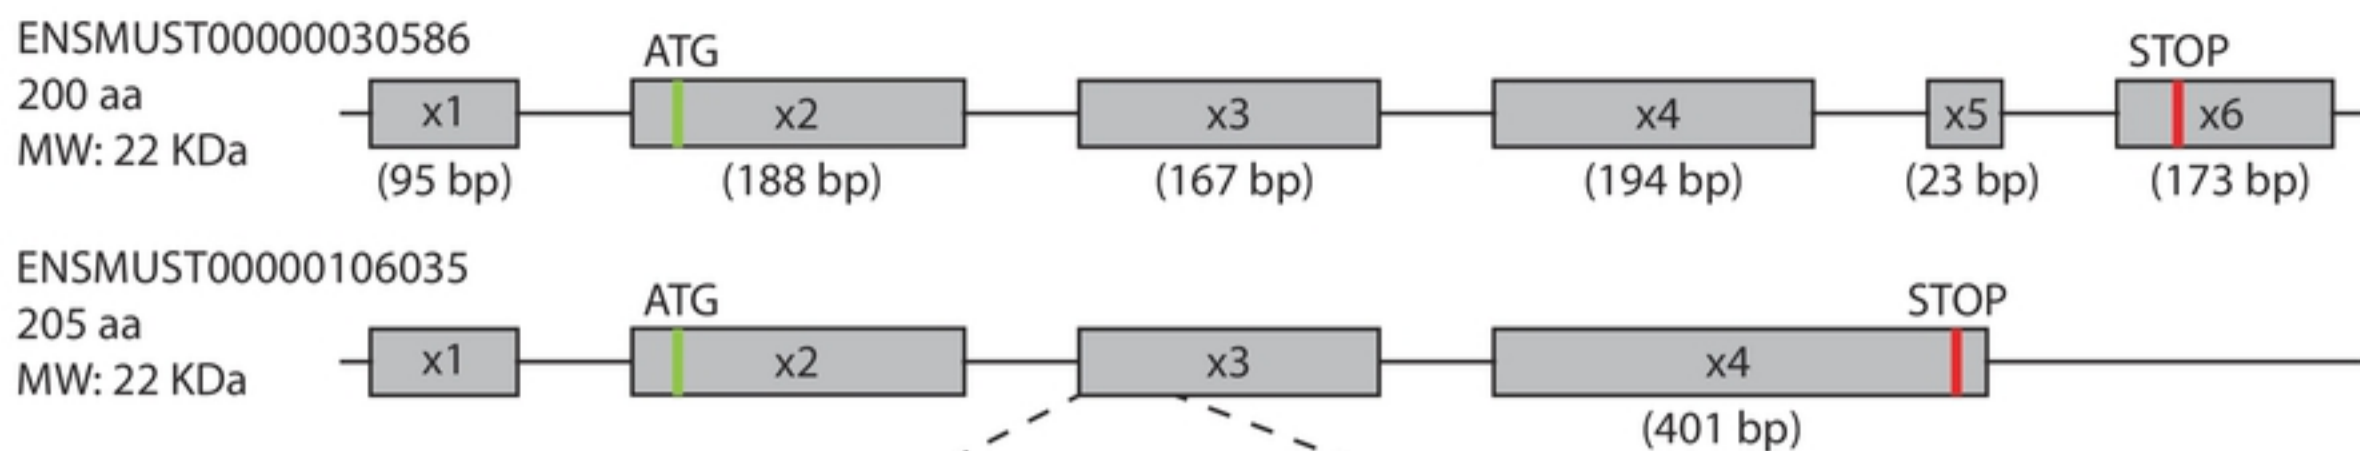

B

bioRxiv preprint doi: <https://doi.org/10.1101/2021.10.21.465251>; this version posted October 22, 2021. The copyright holder for this preprint (which was not certified by peer review) is the author/funder, who has granted bioRxiv a license to display the preprint in perpetuity. It is made available under aCC-BY 4.0 International license.

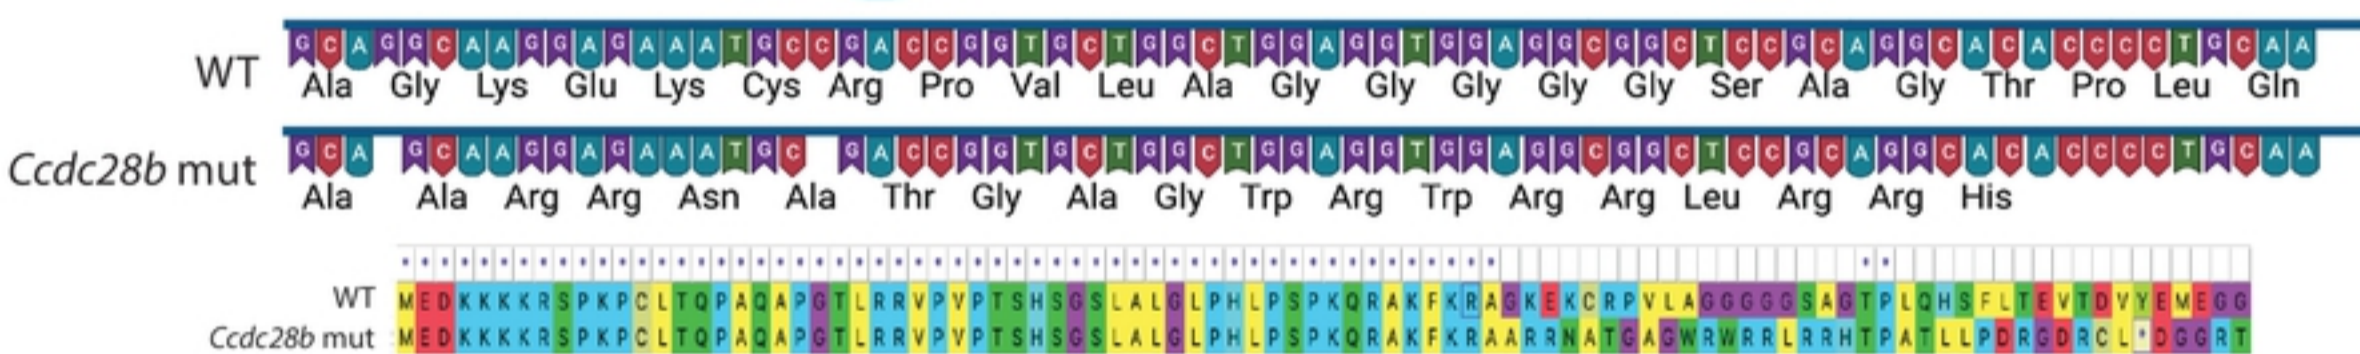

C

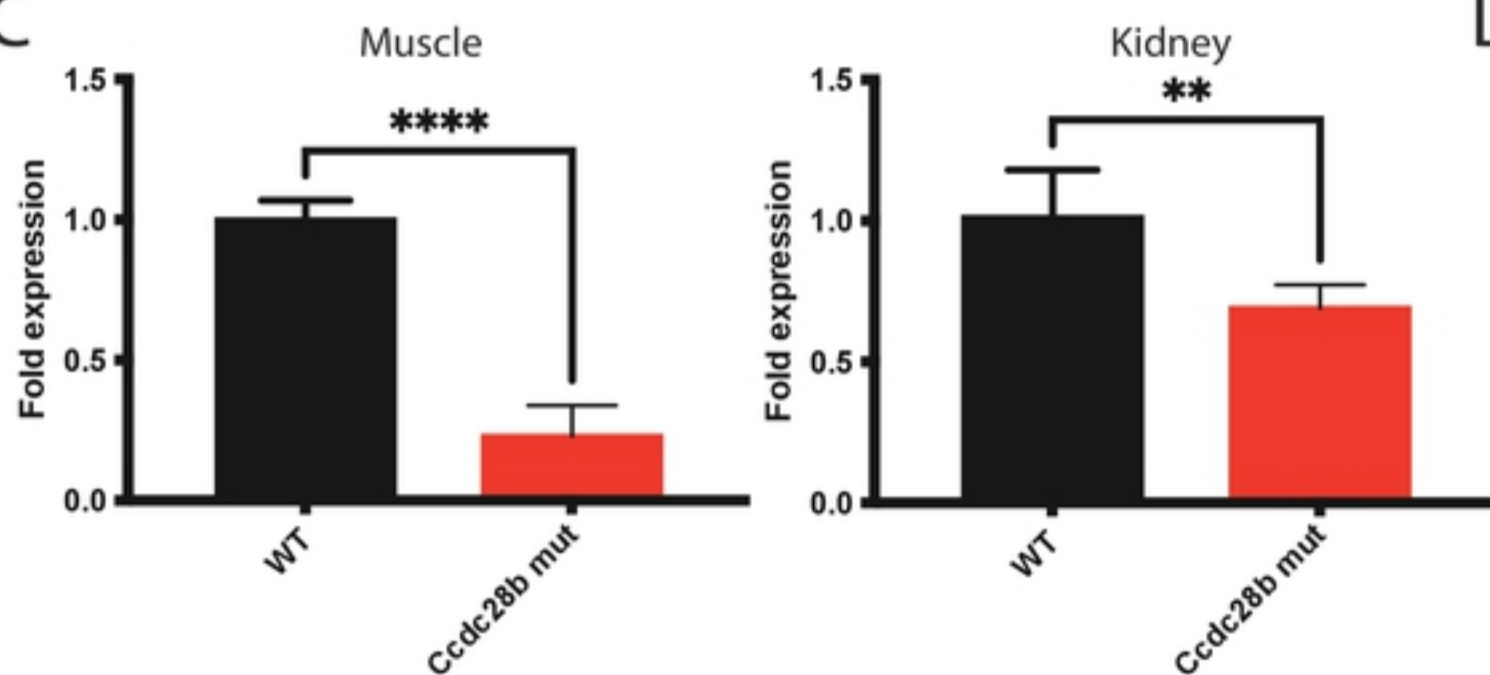

D

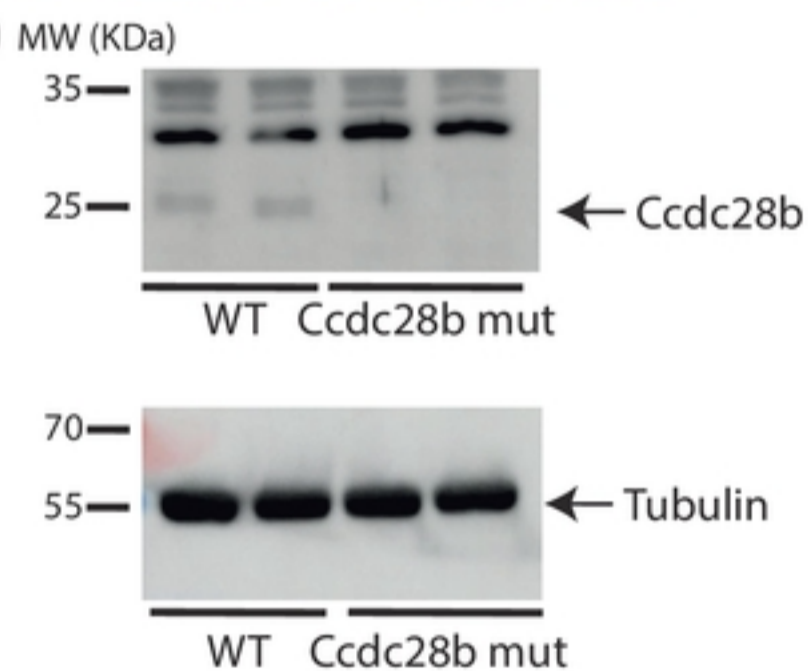

Figure 1

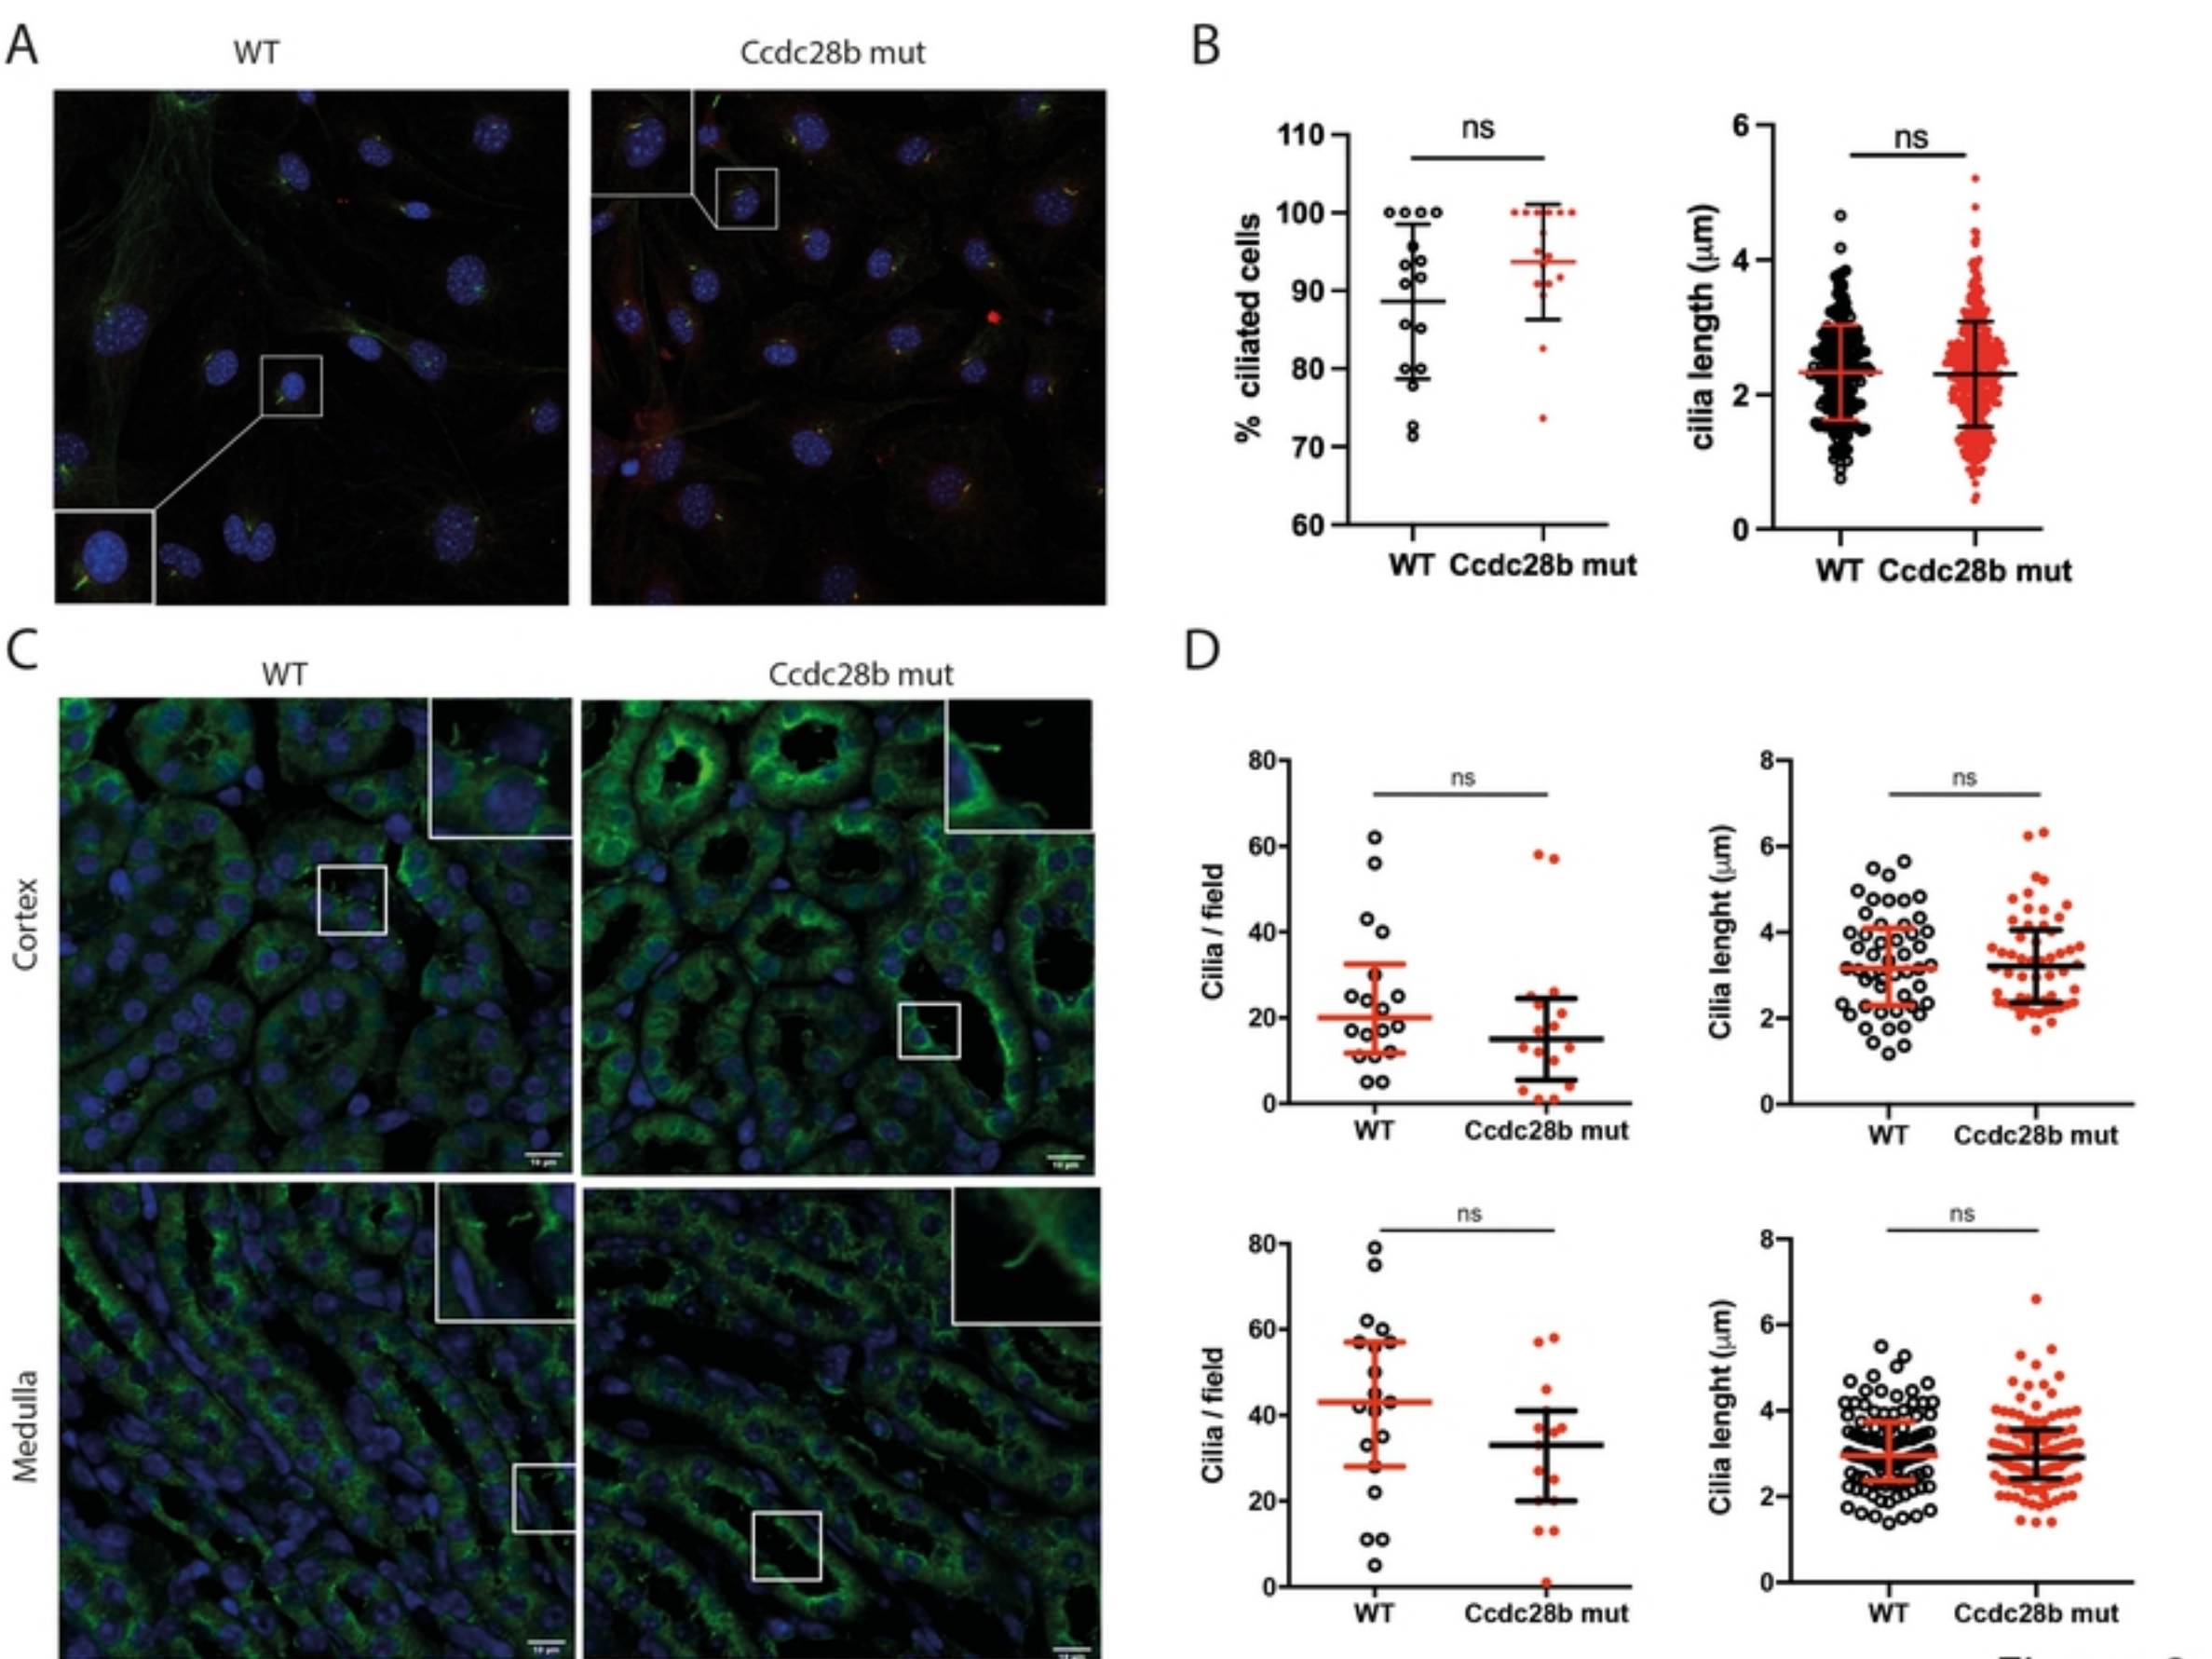

Figure 2

Fig 2

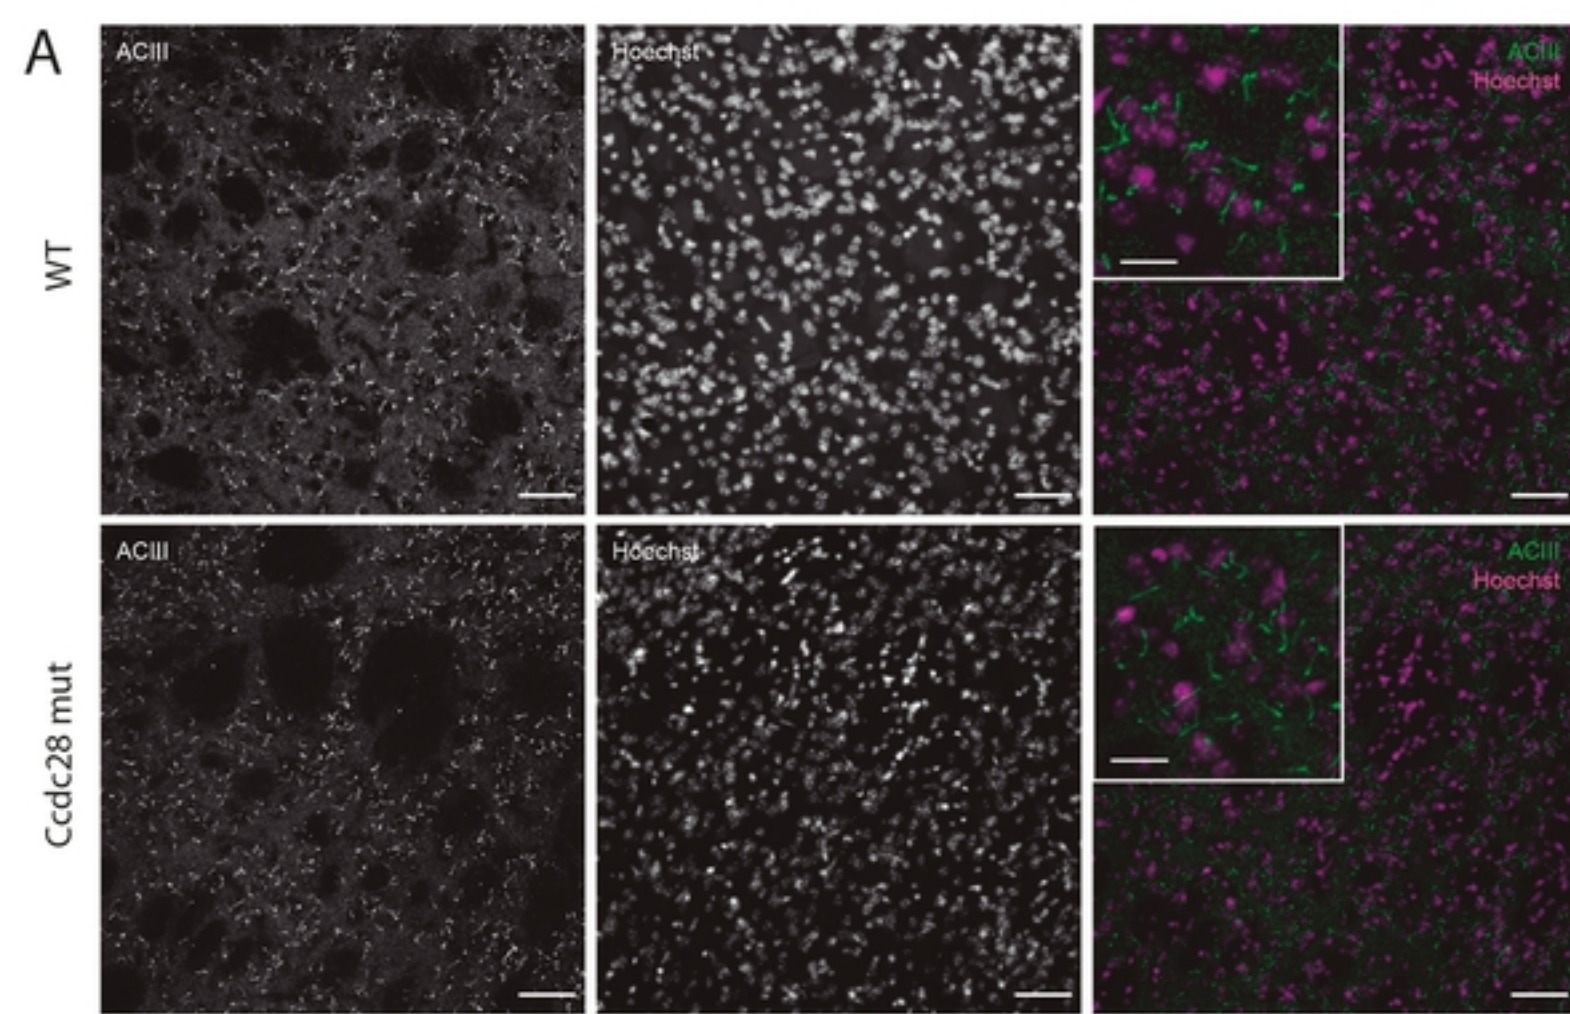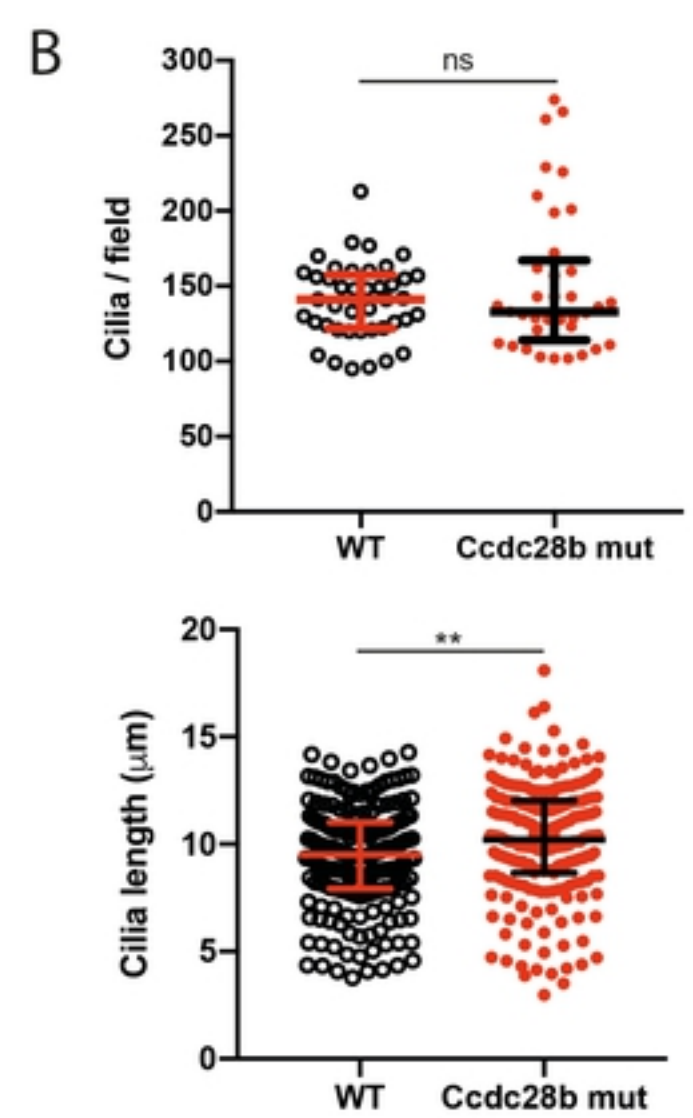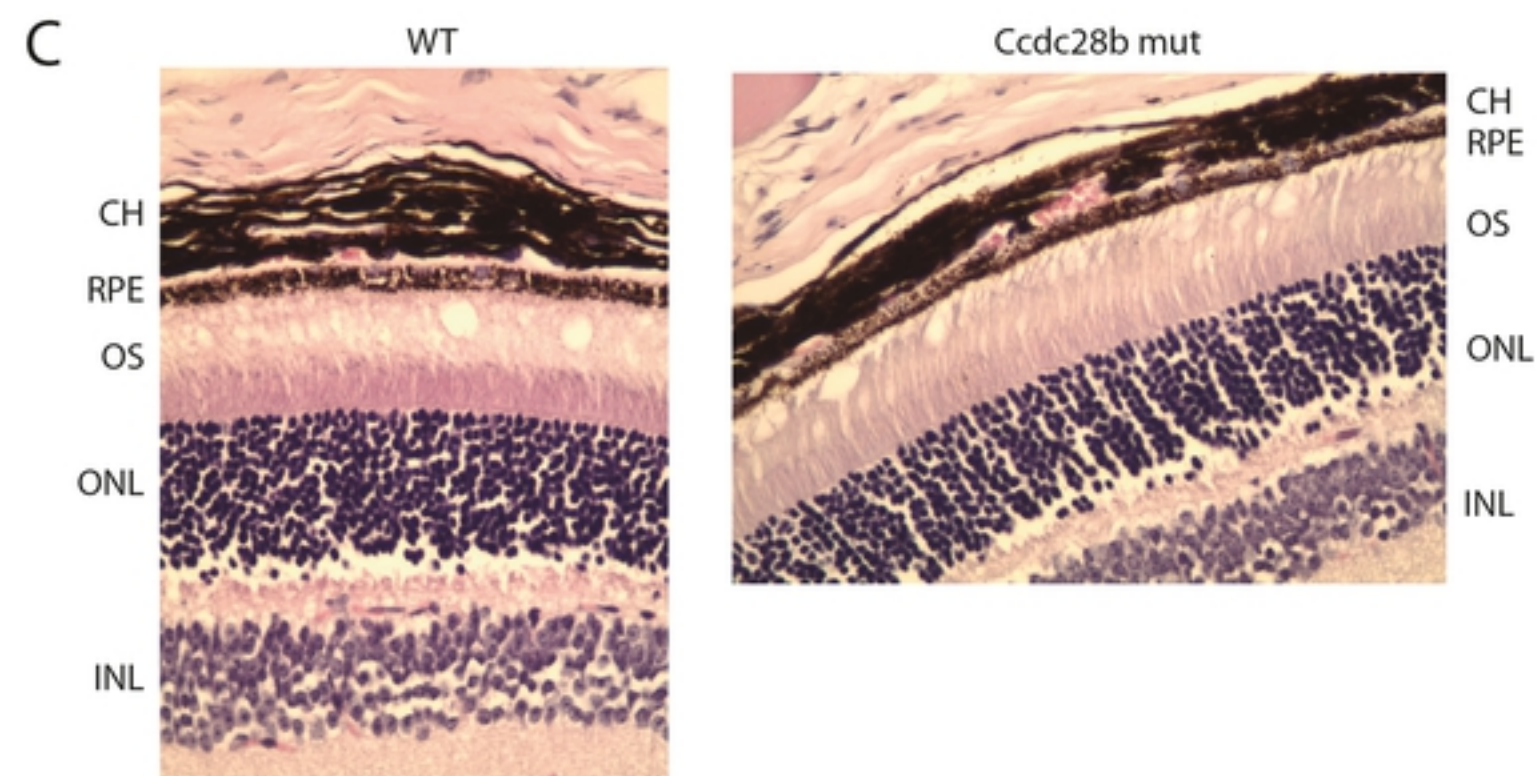

Figure 3

Fig 3

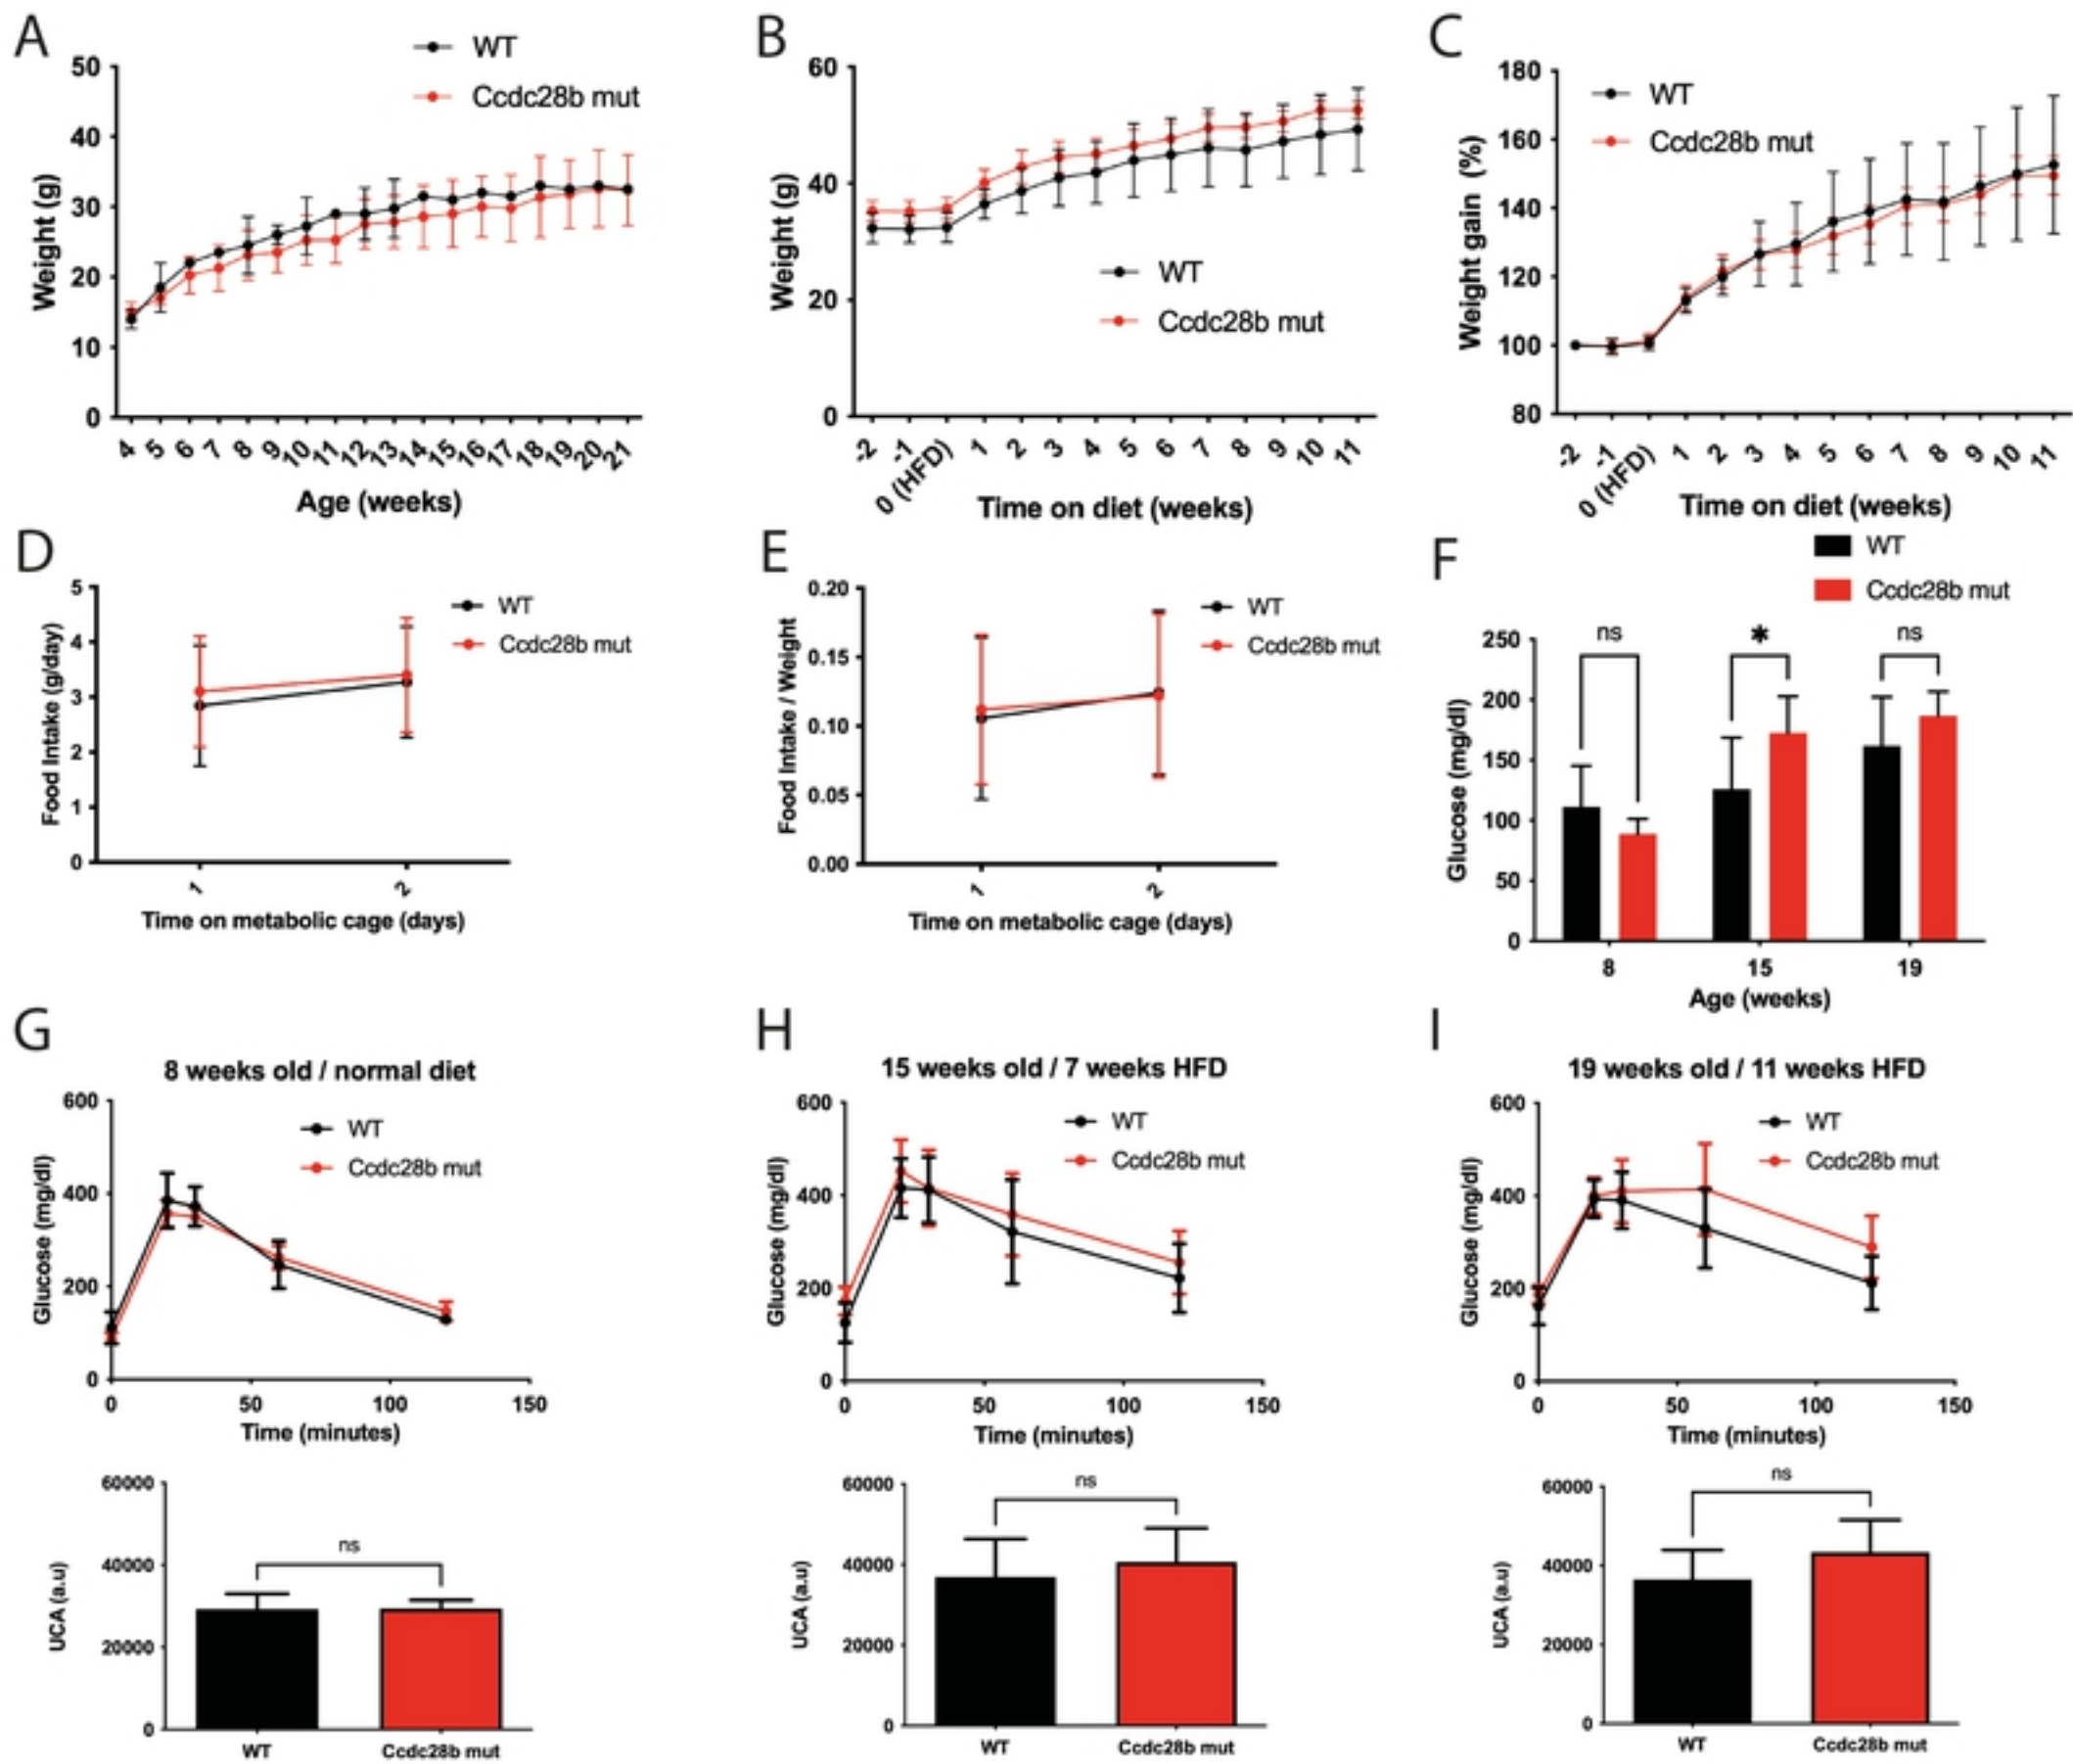

Figure 4

Fig 4

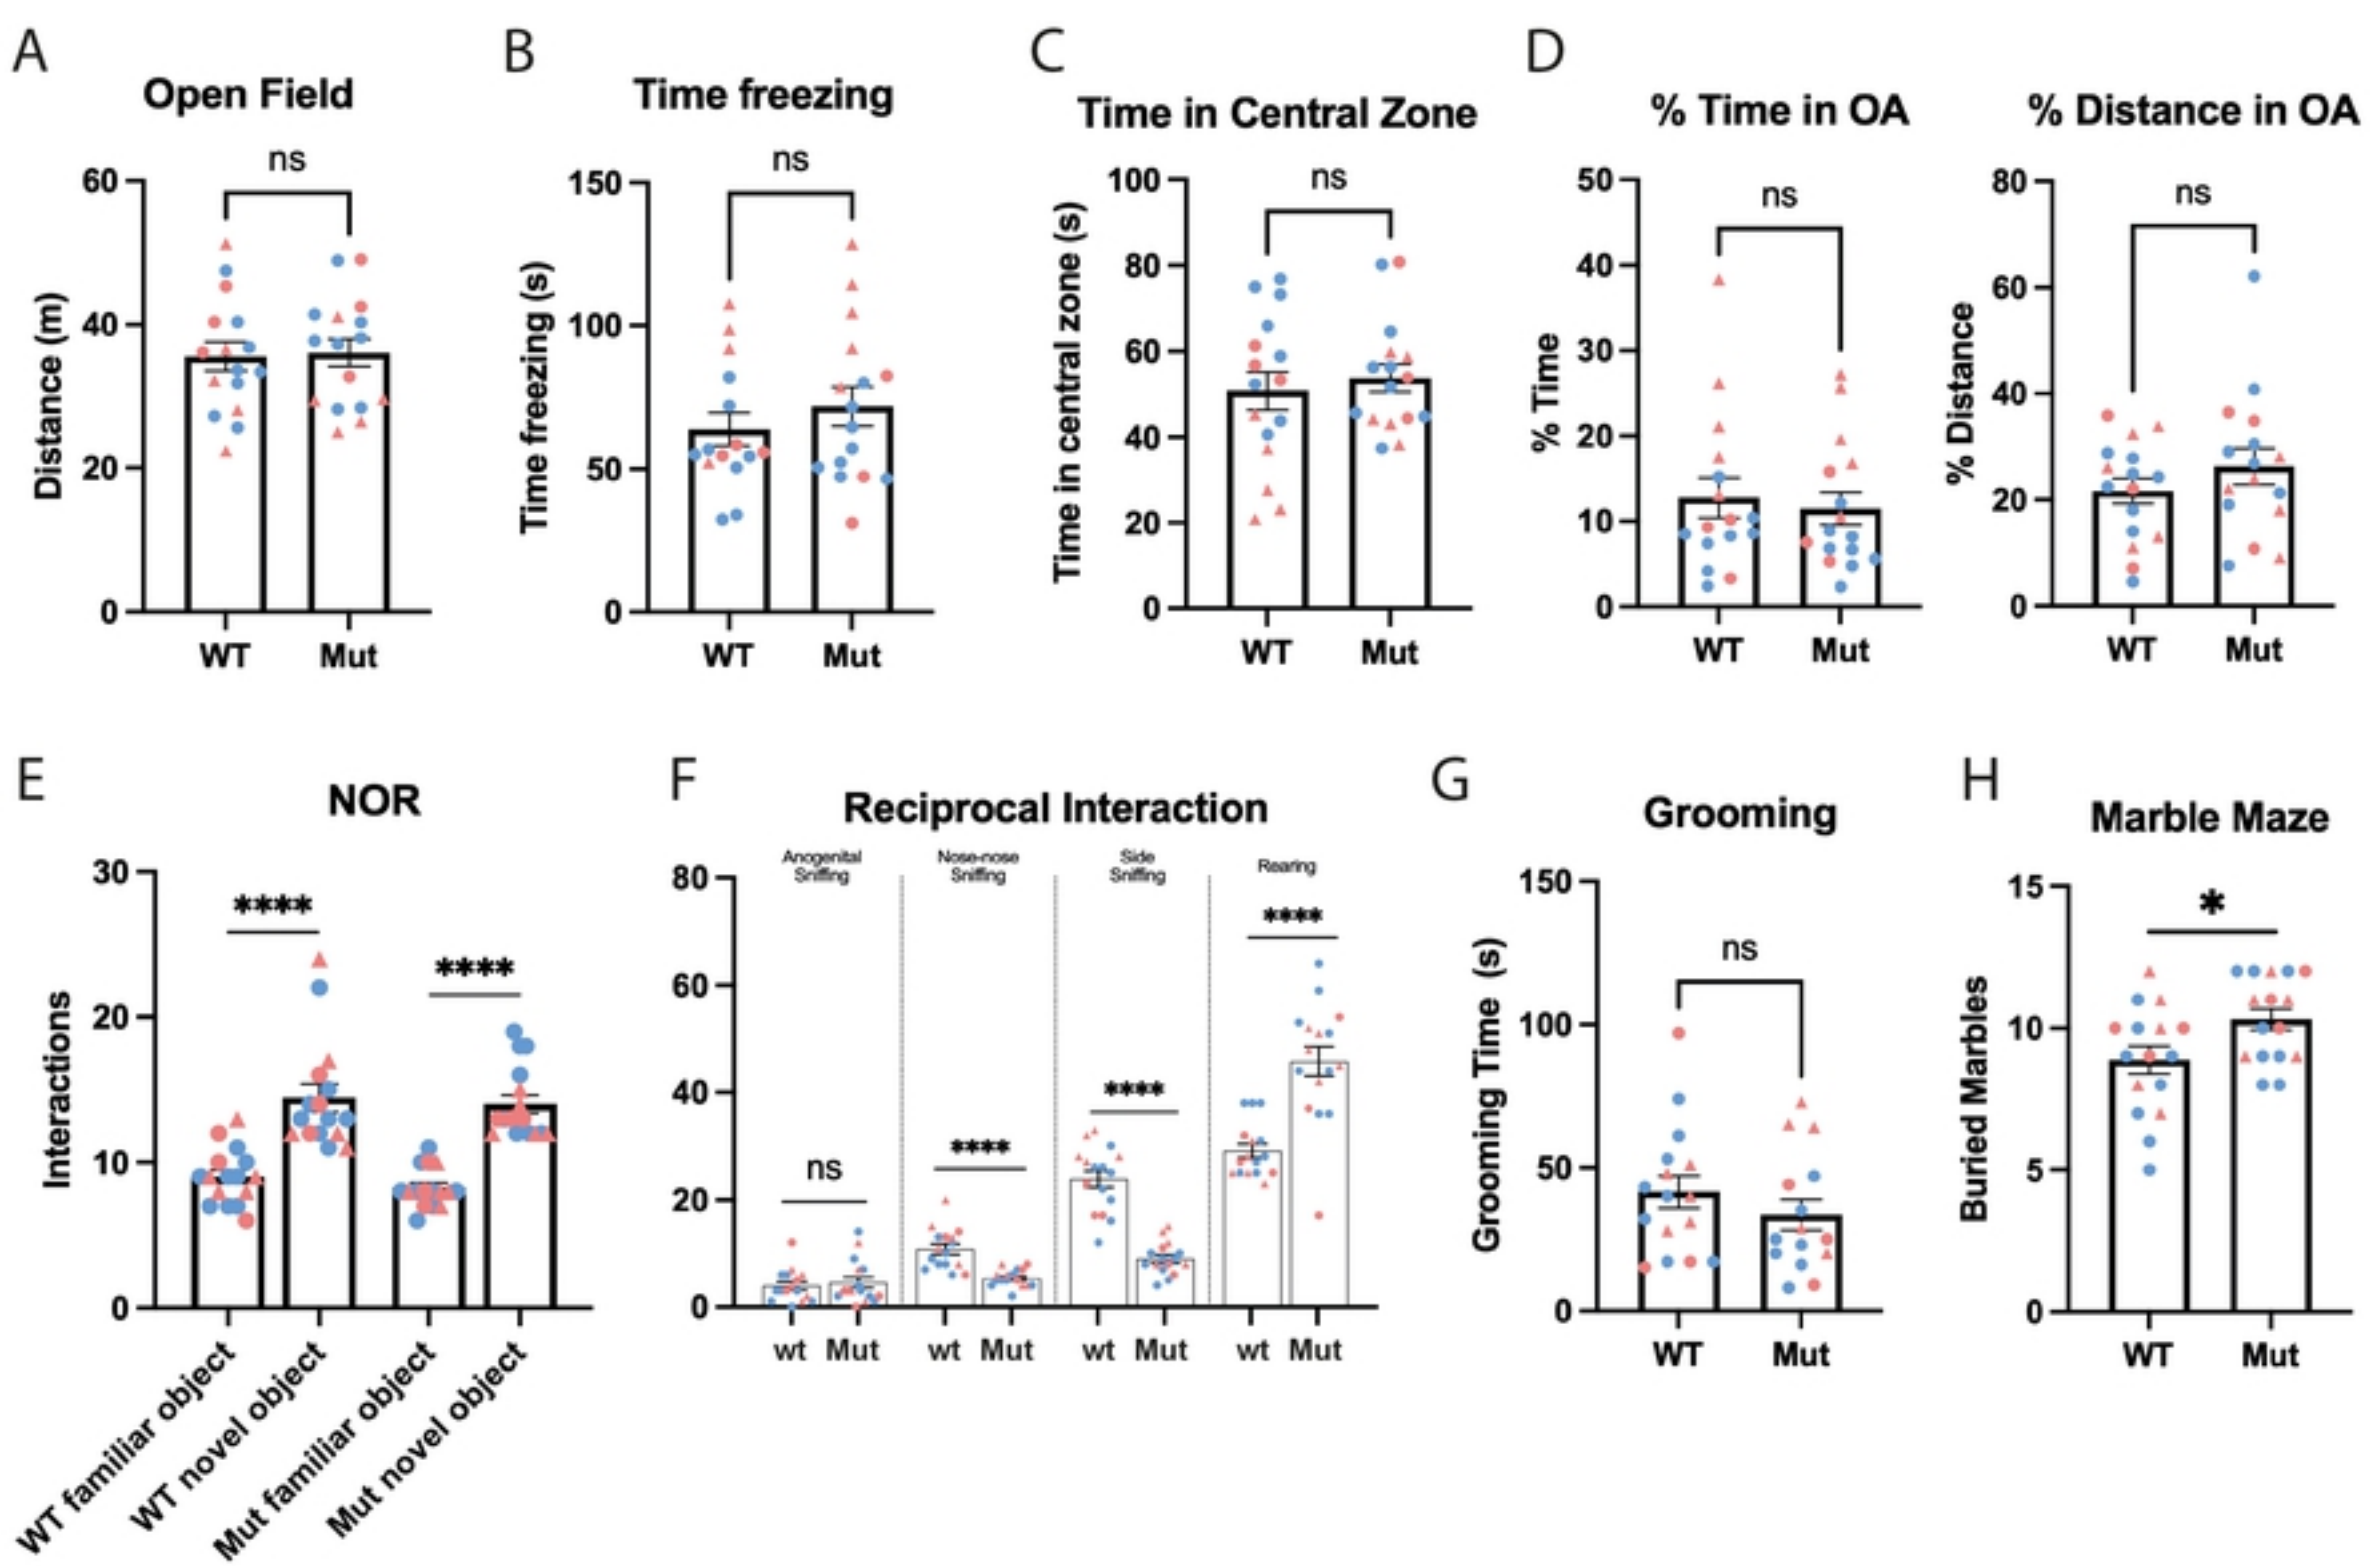

Figure 5

Fig 5
